# Supplementary material for: Proto/Early Renaissance Depictions, Iconographic Analysis and Computerised Face Recognition Connections: 16th Century Frescoes of St. Leocadia Church (Chaves, North of Portugal)
Source: Preprints.org preprint supplement (doi:10.20944/preprints202312.1448.v1), 2023-12-19
Supplement: Supplementary file 1 [file supplementary]

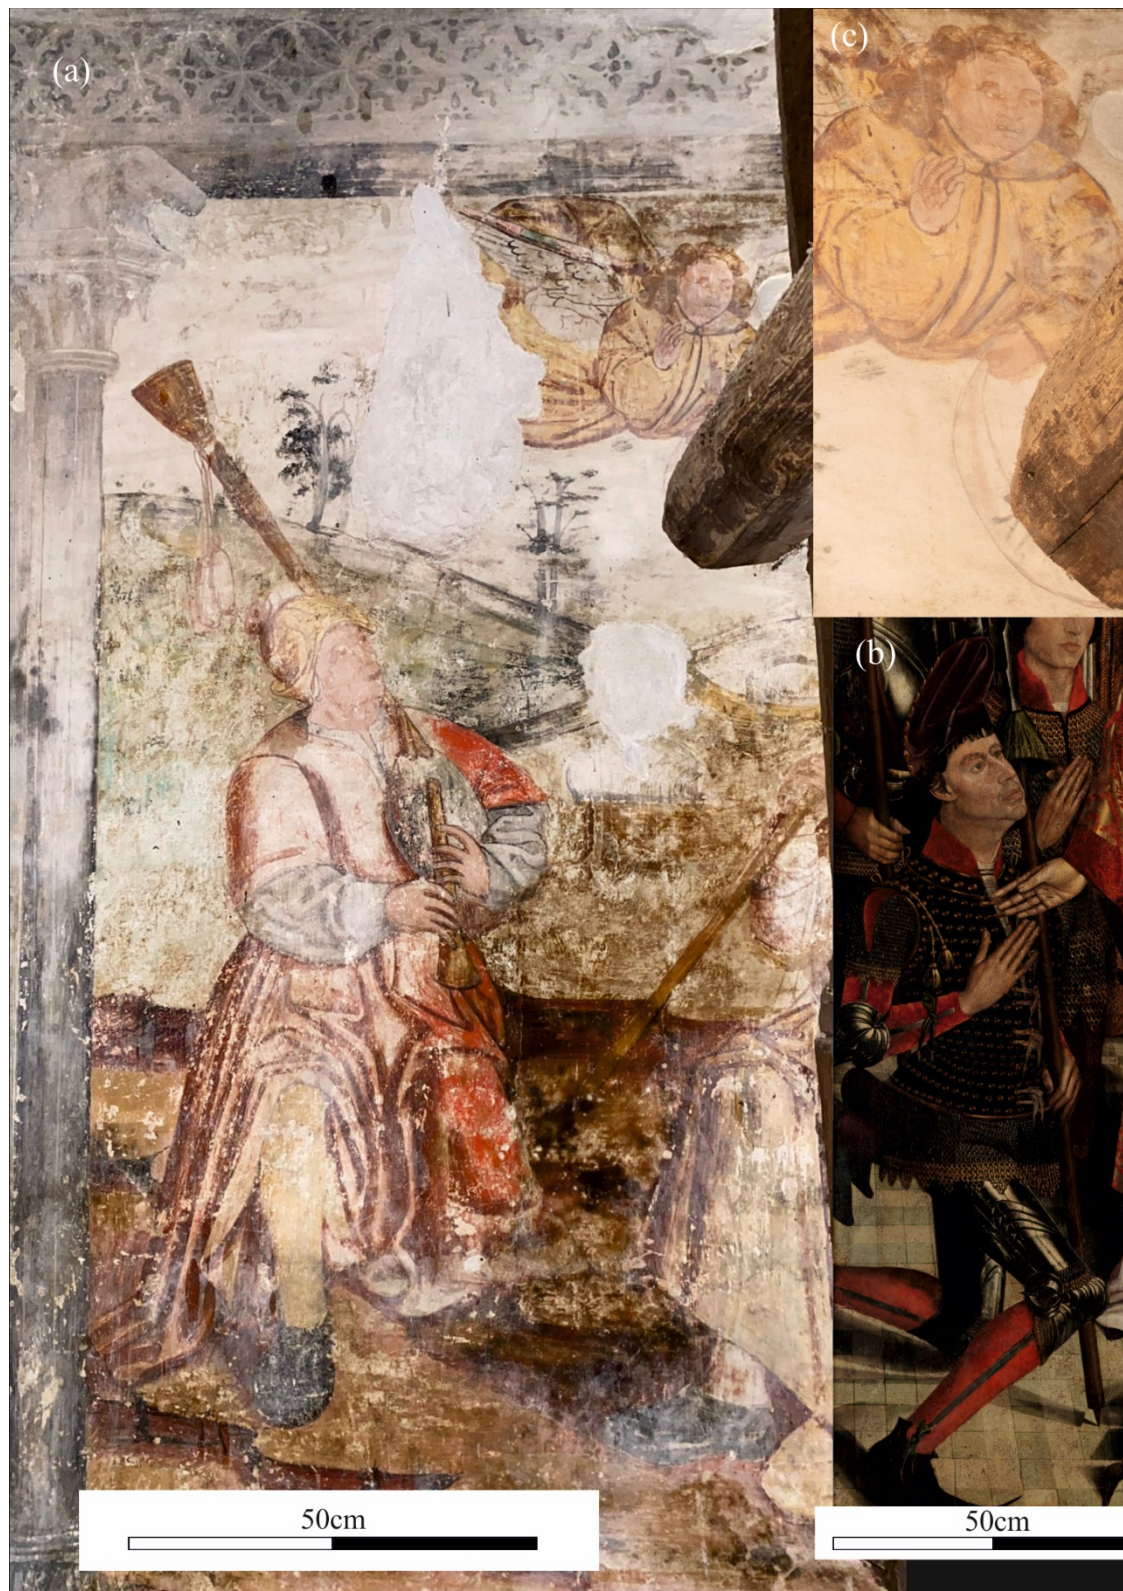

**Figure 7.** Fresco of the Epistle wall of the apse of St. Leocadia Church: (a) *Annunciation to the Shepherds* (175 x 175 cm); Oil Painting by Nuno Gonçalves: (b) *Panel of the Archbishop*; (c) *The Angel of Annunciation*, in detail.
