# Supplementary material for: Proto/Early Renaissance Depictions, Iconographic Analysis and Computerised Face Recognition Connections: 16th Century Frescoes of St. Leocadia Church (Chaves, North of Portugal)
Source: Preprints.org preprint supplement (doi:10.20944/preprints202312.1448.v1), 2023-12-19
Supplement: Supplementary file 2 [file supplementary]

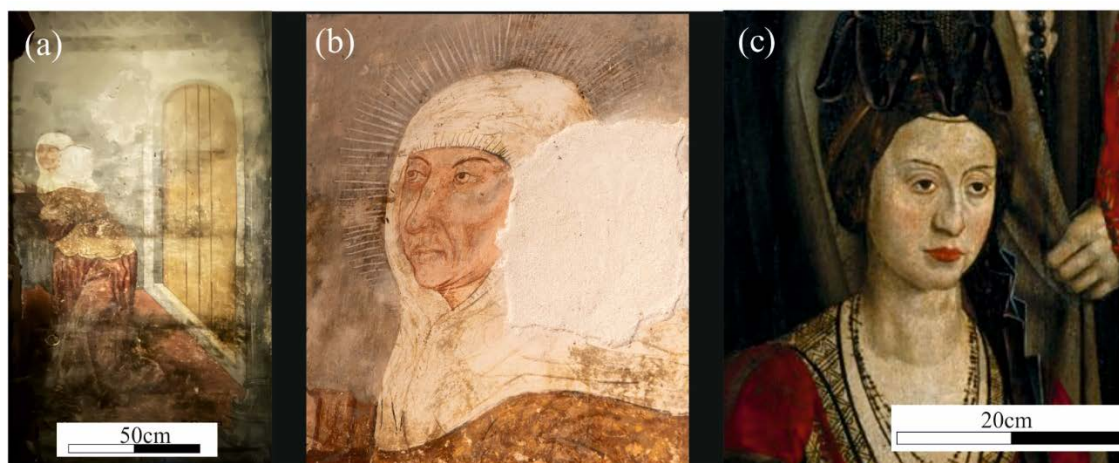

**Figure 6.** *Visitation* Fresco (175 x 175 cm) on Gospel wall of St Leocadia Church: (a)(b) St. Elizabete; (c) Oil painting of Nuno Gonçalves: Isabel de Portugal of the *Panel of the Infante*.
