# Supplementary material for: Proto/Early Renaissance Depictions, Iconographic Analysis and Computerised Face Recognition Connections: 16th Century Frescoes of St. Leocadia Church (Chaves, North of Portugal)
Source: Preprints.org preprint supplement (doi:10.20944/preprints202312.1448.v1), 2023-12-19
Supplement: Supplementary file 3 [file supplementary]

Archive with 20 entries (20 files):
- APPENDICES/Figure 1_NaveStLeocadia.pdf
- APPENDICES/Figure 10_GraphsFRM.pdf
- APPENDICES/Figure 2_ApseStLeocadia.pdf
- APPENDICES/Figure 3_Test_Face Similarity.pdf
- APPENDICES/Figure 4_PanelsSVicent.pdf
- APPENDICES/Figure 5_StPeter_StPaul.pdf
- APPENDICES/Figure 6_Visitation.pdf
- APPENDICES/Figure 7_Annunciation.pdf
- APPENDICES/Figure 8_FlightEgypt.pdf
- APPENDICES/Figure 9_SlaughterInnocents.pdf
- APPENDICES/Figure1_NaveStLeocadia.jpg
- APPENDICES/Figure10_Graphs FRM.jpg
- APPENDICES/Figure2_Abside_StaLeocadia.jpg
- APPENDICES/Figure3_Test - Face Similarity.jpg
- APPENDICES/Figure4_PanelsS.Vicent.jpg
- APPENDICES/Figure5_StPeter_StPaul.jpg
- APPENDICES/Figure6_Visitation.jpg
- APPENDICES/Figure7_Annunciation.jpg
- APPENDICES/Figure8_Flight into Egypt.jpg
- APPENDICES/Figure9_Slaughter Innocents.jpg
