# Supplementary material for: Proto/Early Renaissance Depictions, Iconographic Analysis and Computerised Face Recognition Connections: 16th Century Frescoes of St. Leocadia Church (Chaves, North of Portugal)
Source: Preprints.org preprint supplement (doi:10.20944/preprints202312.1448.v1), 2023-12-19
Supplement: Supplementary file 3 [file supplementary › APPENDICES/Figure 1_NaveStLeocadia.pdf]

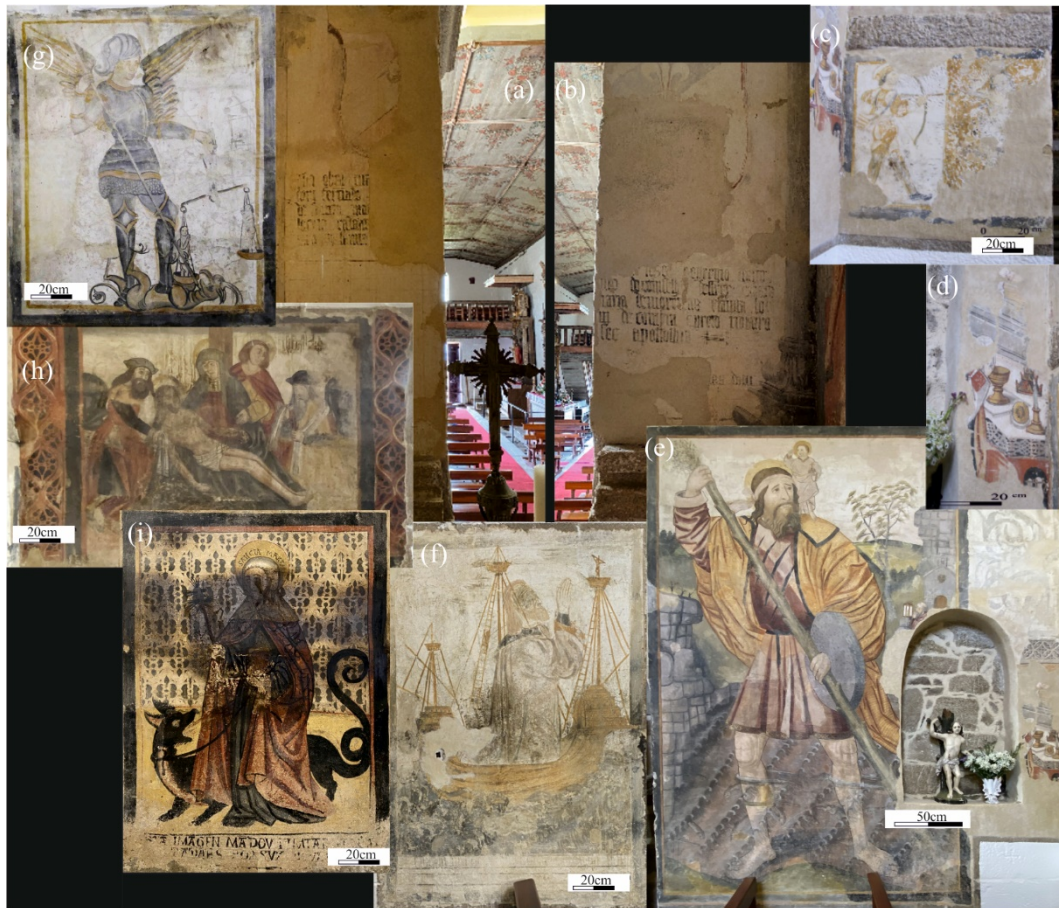

**Figure 1.** Frescoes of Santa Leocadia Church: (a) (b) Bipartite composition of an Inscription, in Epistle and Gospel sides of Triumphal Arch of the apse; frescoes in the nave: (c) *Martyrdom of Saint Sebastian*; (d) *Saint Gregory's Mass*; (e) *Saint Christobal*; (f) *Caravel (ex-voto)*; (g) *Archangel Saint Michael*; (h) *Lamentation over Dead Christ*; (i) *Saint Martha*.
