# Supplementary material for: Proto/Early Renaissance Depictions, Iconographic Analysis and Computerised Face Recognition Connections: 16th Century Frescoes of St. Leocadia Church (Chaves, North of Portugal)
Source: Preprints.org preprint supplement (doi:10.20944/preprints202312.1448.v1), 2023-12-19
Supplement: Supplementary file 3 [file supplementary › APPENDICES/Figure 2_ApseStLeocadia.pdf]

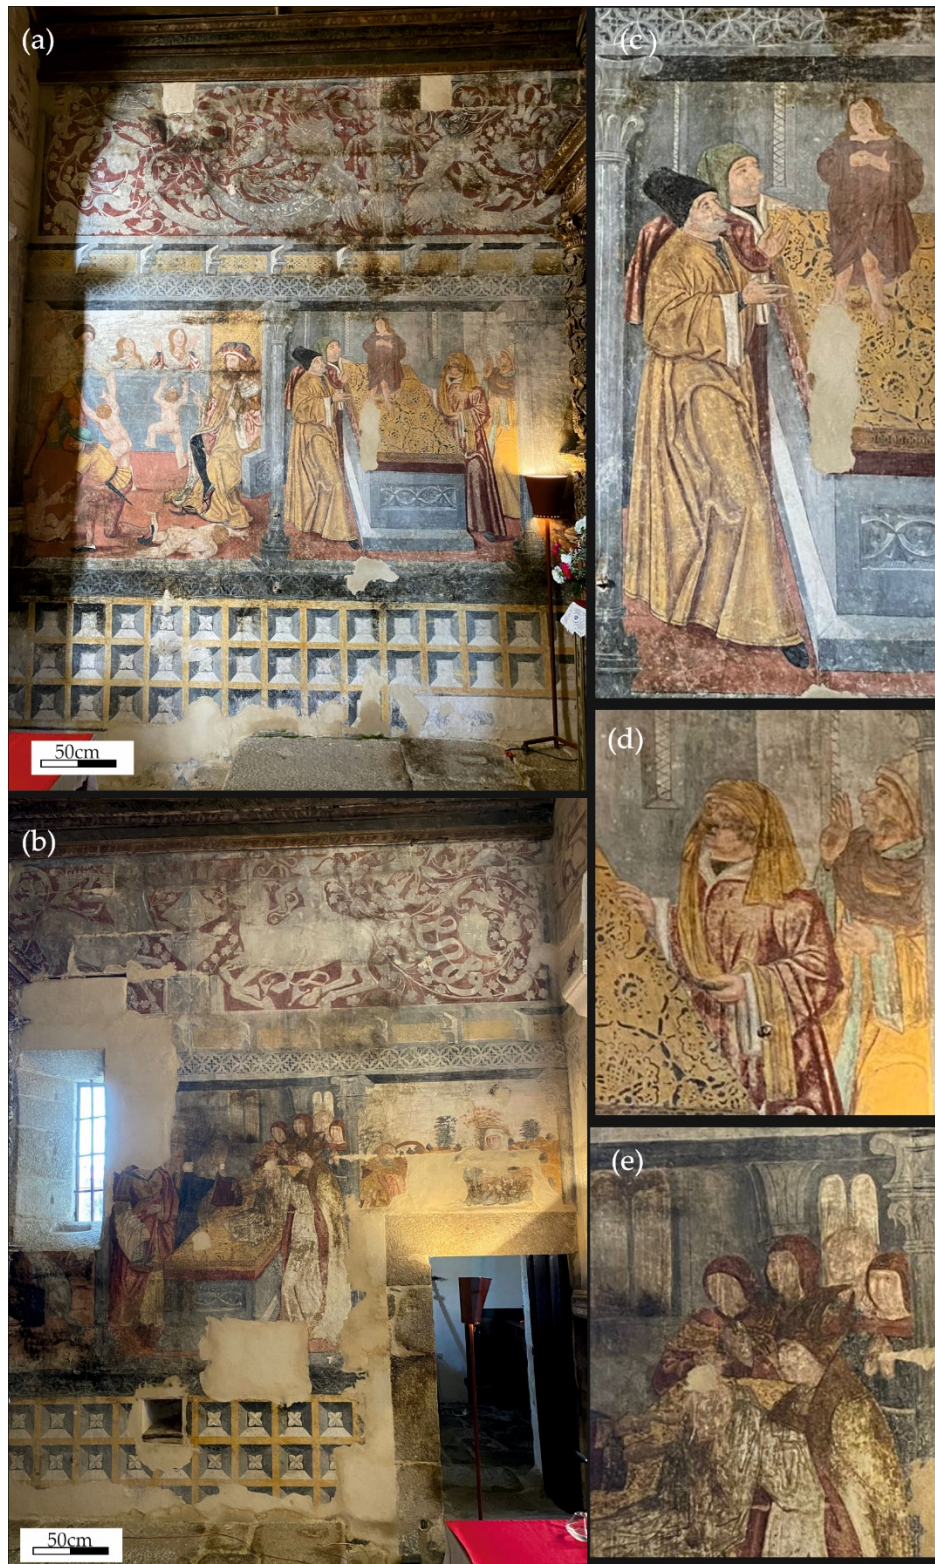

**Figure 2.** Frescoes of the apse of St. Leocadia Church: (a) on Gospel wall, *Slaughter of Innocents* (175 x 175 cm) and *Jesus among Doctors* (175 x 175 cm); (b) on Epistle wall, *Jesus Presentation in the Temple* (175 x 175 cm) and *Flight into Egypt* (175 x 175 cm); it is proposed a comparative visual analysis between the characters in the St Leocadia frescoes and those in the Vincentian Panels: (c) Estevão de Aguiar and Jew Rabi, of the Vincentine *Panels of the Friars* and of the *Relic*; (d) Frier João Alvares of the *Panel of the Relic*; (e) Archbishop, D. Alvaro Vaz de Almada, D. Jaime and D. Pedro Contestable, of the Vincentine *Panel of the Archbishop*.
