# Supplementary material for: Proto/Early Renaissance Depictions, Iconographic Analysis and Computerised Face Recognition Connections: 16th Century Frescoes of St. Leocadia Church (Chaves, North of Portugal)
Source: Preprints.org preprint supplement (doi:10.20944/preprints202312.1448.v1), 2023-12-19
Supplement: Supplementary file 3 [file supplementary › APPENDICES/Figure 3_Test_Face Similarity.pdf]

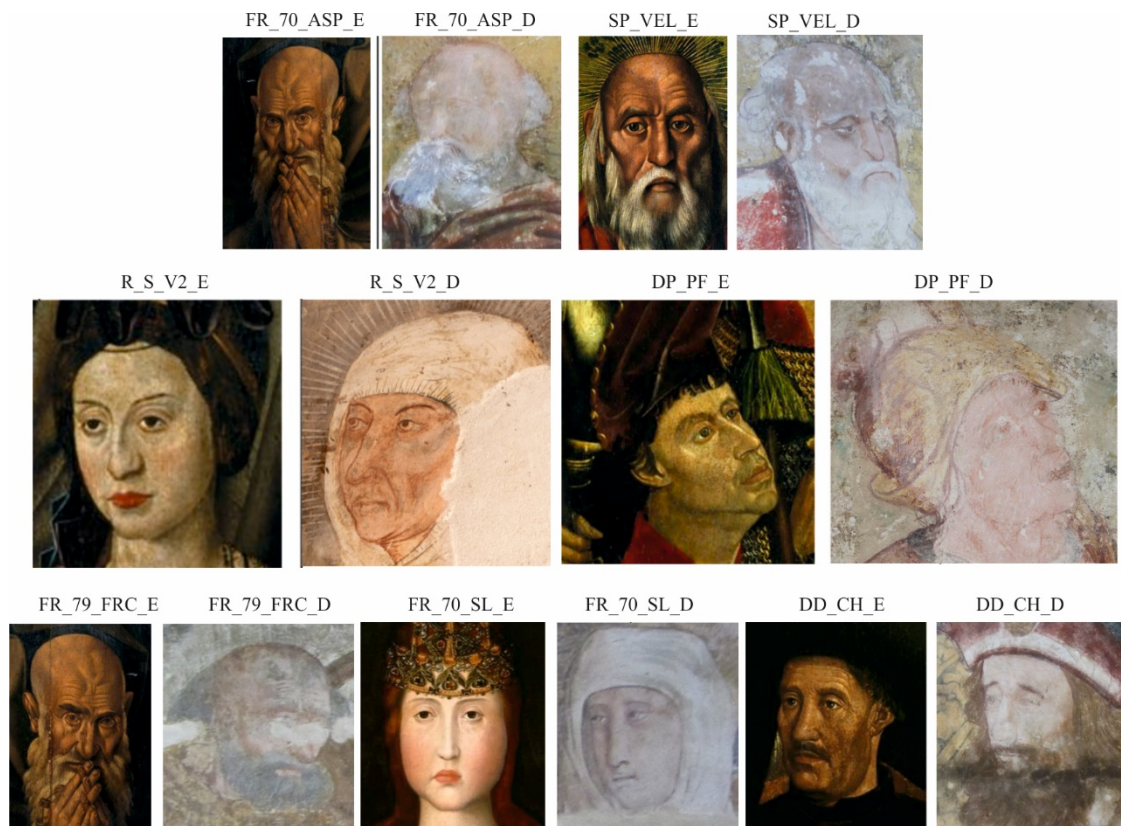

**Figure 3** – Selected images for training and testing of facial feature specific models. FR-70\_ASP\_E vs D: Franciscan friar vs St. Peter; SP\_VEL\_E vs D: St. Paul vs St. Paul; R\_SV2\_E vs D: Queen Elizabeth vs St. Elizabeth of Visitation; DP\_PF\_E vs D: Infante D. Pedro vs Annunciation to the Shepherds; FR\_79\_FRC\_E vs D: Franciscan friar vs St. Joseph of Flight into Egypt; FR\_70\_SL\_E vs D: Saint Joan Princess vs Our Lady of Flight into Egypt; and DD\_CH\_E vs D: King D. Duarte vs the man with chaperon of the Slaughter of the Innocents.
