# Supplementary material for: Proto/Early Renaissance Depictions, Iconographic Analysis and Computerised Face Recognition Connections: 16th Century Frescoes of St. Leocadia Church (Chaves, North of Portugal)
Source: Preprints.org preprint supplement (doi:10.20944/preprints202312.1448.v1), 2023-12-19
Supplement: Supplementary file 3 [file supplementary › APPENDICES/Figure 4_PanelsSVicent.pdf]

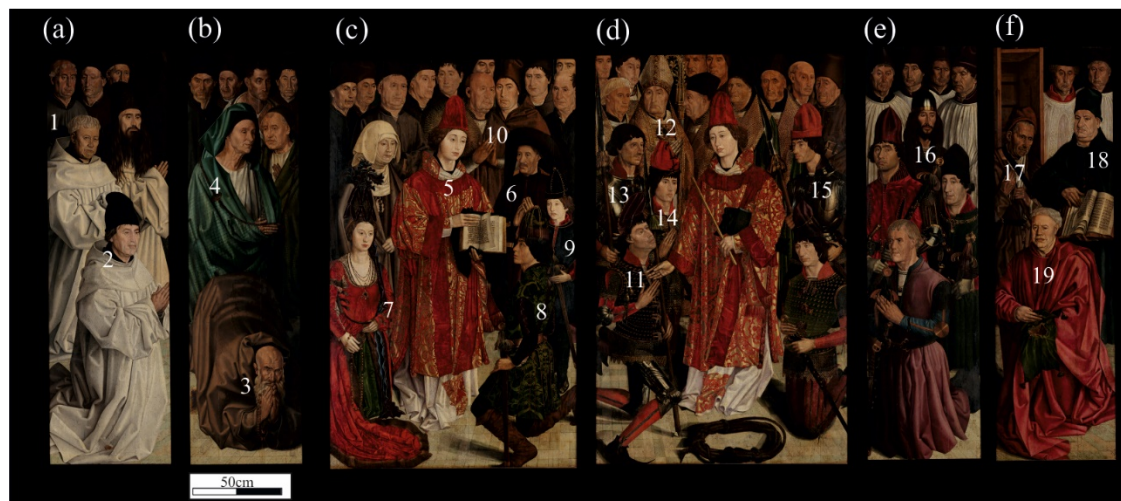

**Figure 4.** *Panels of Saint Vincent, 1460-1470: (a) Panel of the Friars (207,2 x 64,2 cm); (b) Panel of the Fisherman (207 x 60 cm); (c) Panel of the Prince or Panel of the Infant (206,4 x 128 cm); (d) Panel of the Archbishop (206,4 x 128 cm); (e) Panel of the Knights (206,6 x 60,4 cm); (f) Panel of the Relic (206,5 x 63,1 cm).* MNAA, <http://www.museudearteantiga.pt>; Character identification [44]: 1- John Vicent; 2 – Estêvão de Aguiar; 3 – Simon Peter; 4 – St John the Evangelist; 5 – St Vincent; 6 – King D. Duarte; 7 – Queen Isabel; 8 – King D. Afonso V; 9 – Prince John; 10 – 1st Duke of Bragança; 11 – Infante D. Pedro; 12 – Archbishop of Lisbon; 13 – Álvaro Vaz de Almada, 14 – D. Jaime; 15 – Constable Pedro; 16 – Infante D. Fernando; 17 – Beggar; 18 – Jewish rabbi; 19 – Friar João Alvares.
