# Supplementary material for: Proto/Early Renaissance Depictions, Iconographic Analysis and Computerised Face Recognition Connections: 16th Century Frescoes of St. Leocadia Church (Chaves, North of Portugal)
Source: Preprints.org preprint supplement (doi:10.20944/preprints202312.1448.v1), 2023-12-19
Supplement: Supplementary file 3 [file supplementary › APPENDICES/Figure 5_StPeter_StPaul.pdf]

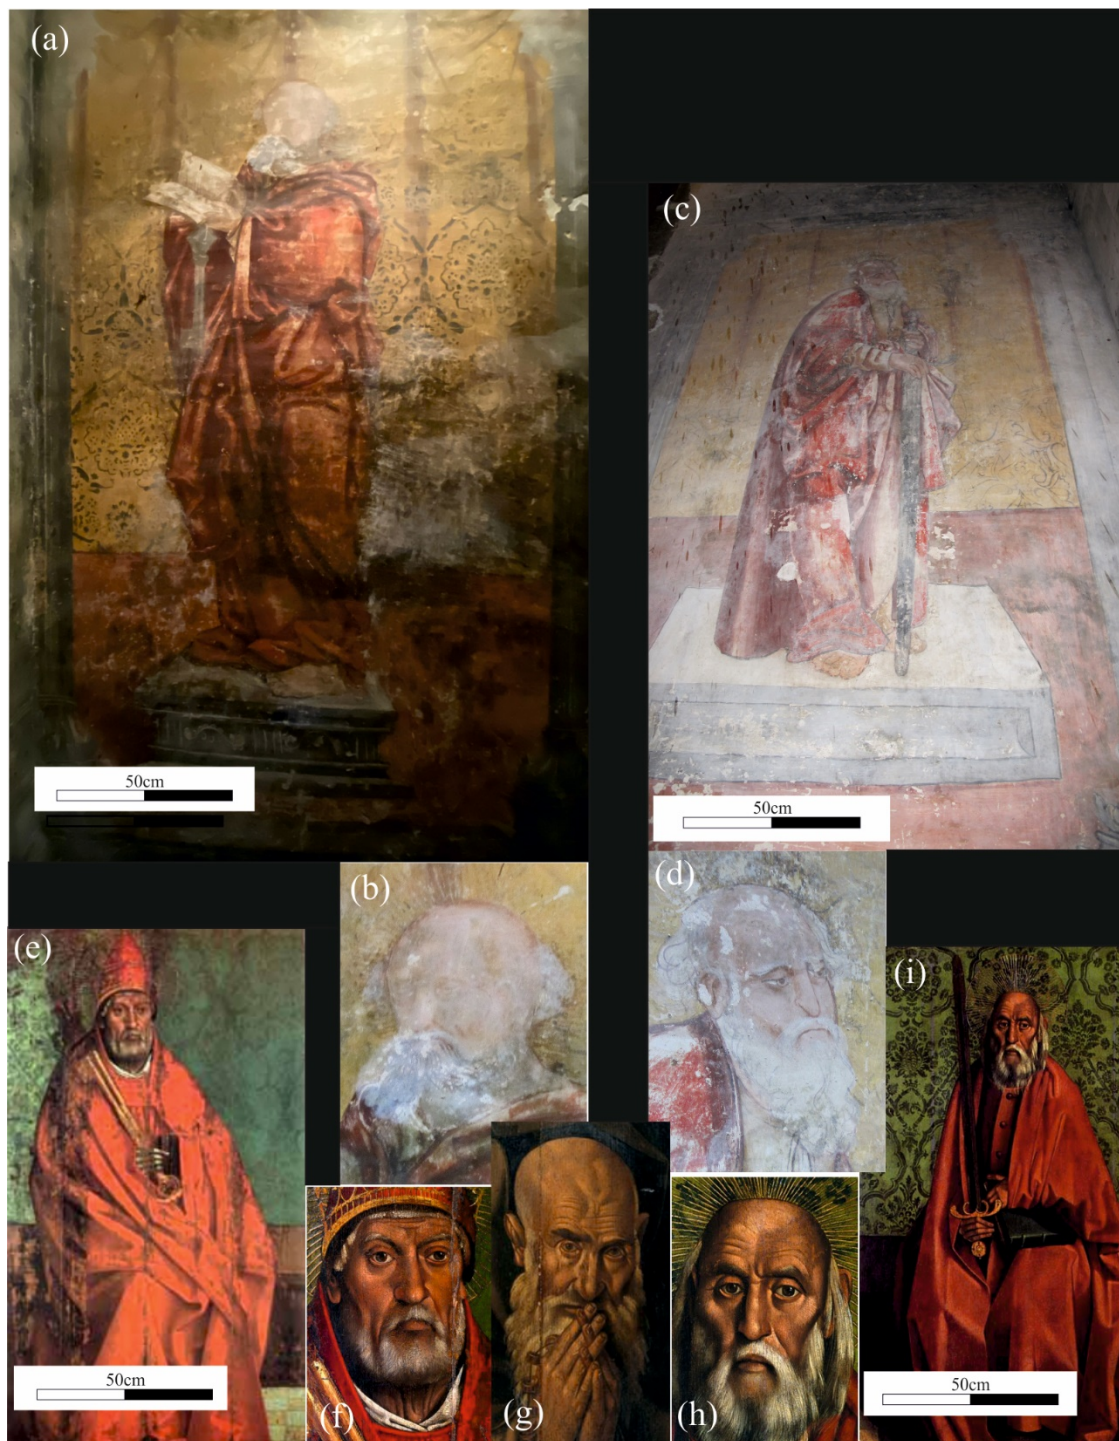

**Figure 5.** Frescoes of the back wall of the apse of St. Leocadia Church: (a), (b) *St. Peter* (175 x 148 cm) and (c), (d) *St. Paul* (175 x 148 cm); Oil painting of Nuno Gonçalves: (e), (f) *St. Peter*, 1450-1490 (135,8 x 80,3 cm); (g) Old Franciscan of the *Panel of Fisherman* 1470 (207 x 60 cm); (h), (i) *St. Paul*, 1450-1490 (137 x 84 cm).
