# Supplementary material for: Proto/Early Renaissance Depictions, Iconographic Analysis and Computerised Face Recognition Connections: 16th Century Frescoes of St. Leocadia Church (Chaves, North of Portugal)
Source: Preprints.org preprint supplement (doi:10.20944/preprints202312.1448.v1), 2023-12-19
Supplement: Supplementary file 3 [file supplementary › APPENDICES/Figure 8_FlightEgypt.pdf]

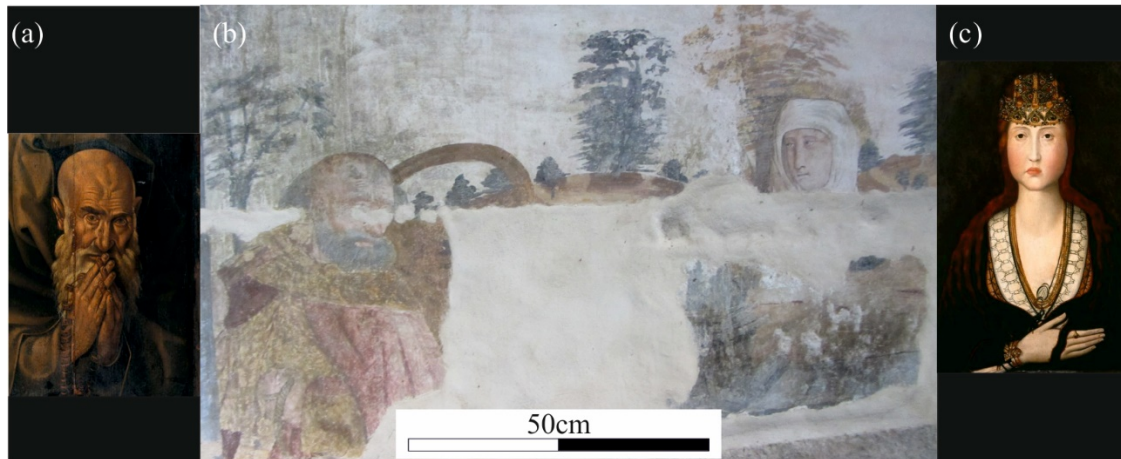

**Figure 8.** Fresco of the Epistle wall of the apse of St. Leocadia Church: (a) *Flight into Egypt*; (b) St. Joseph; (d) Our Lady. Oil Painting by Nuno Gonçalves: (c) Franciscan of the *Panel of Fisherman*; (e) *Santa Joana Princesa* (portrait of Saint Joan Princess, 1472-1475, oil painting on oak wood, 60 x 40 cm) <http://www.matriznet.dgpc.pt/>.
