# Supplementary material for: Proto/Early Renaissance Depictions, Iconographic Analysis and Computerised Face Recognition Connections: 16th Century Frescoes of St. Leocadia Church (Chaves, North of Portugal)
Source: Preprints.org preprint supplement (doi:10.20944/preprints202312.1448.v1), 2023-12-19
Supplement: Supplementary file 3 [file supplementary › APPENDICES/Figure 9_SlaughterInnocents.pdf]

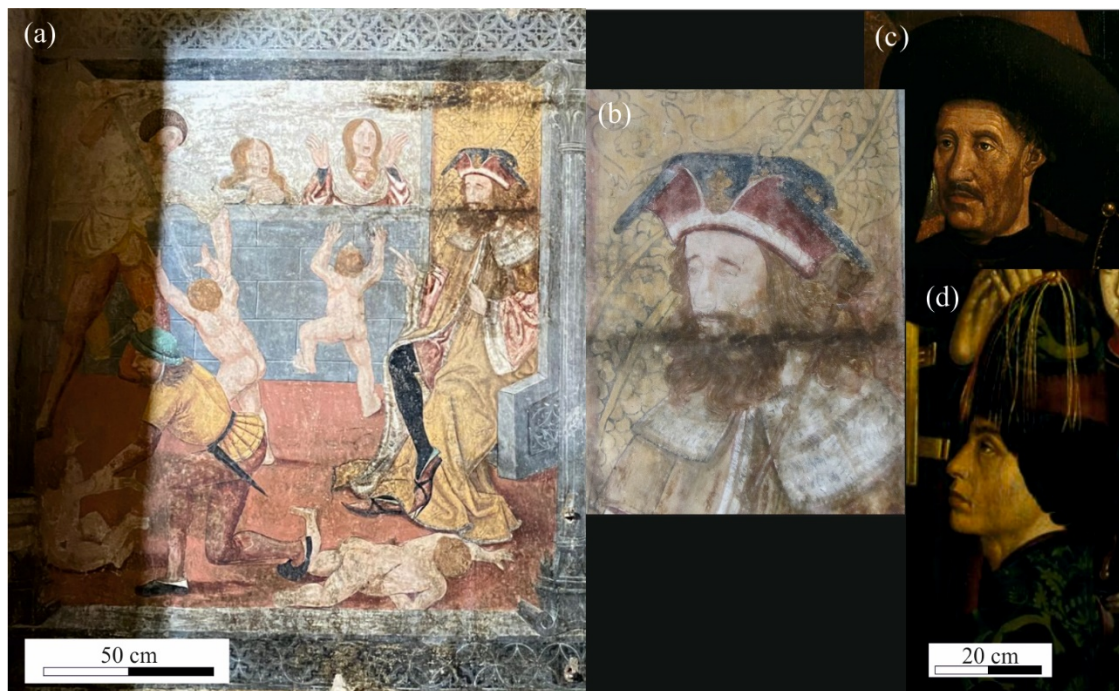

**Figure 9.** Fresco of the Gospel wall of the apse of St. Leocadia Church: (a) (b) Slaughter of the Innocents; Oil Painting by Nuno Gonçalves, *Panel of the Infant*: (c) King D. Duarte; (d) King D. Afonso V.
