# Supplementary material for: Proto/Early Renaissance Depictions, Iconographic Analysis and Computerised Face Recognition Connections: 16th Century Frescoes of St. Leocadia Church (Chaves, North of Portugal)
Source: Preprints.org preprint supplement (doi:10.20944/preprints202312.1448.v1), 2023-12-19
Supplement: Supplementary file 3 [file supplementary › APPENDICES/Figure 10_GraphsFRM.pdf]

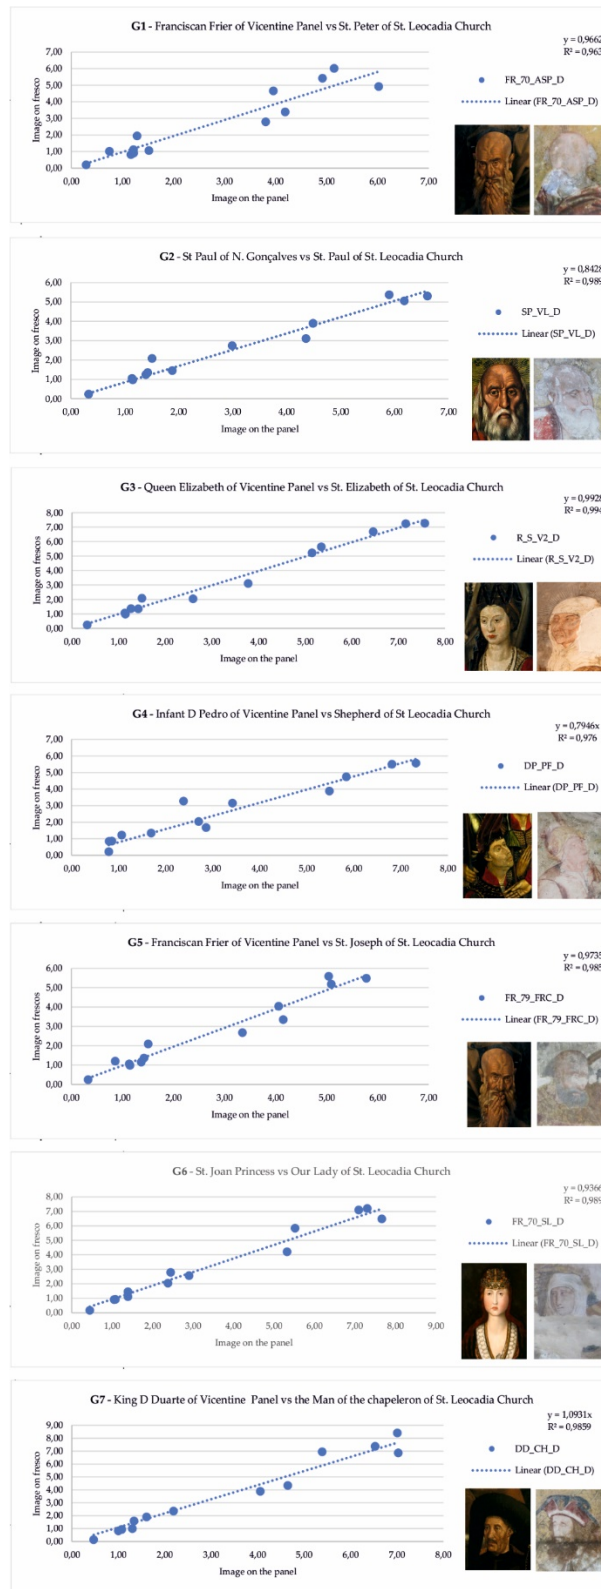

**Figure 10** – Graphs expressing linear regression equation without constant for each pair of values (image pairs): G1 - Franciscan friar vs *St. Peter*; G2 - Paul vs *St. Paul*; G3 - Queen Elizabeth vs *St. Elizabeth of Visitation*; G4 - D: Infante D. Pedro vs *Annunciation to the Shepherds*; G5 - Franciscan friar vs *St. Joseph of Flight into Egypt*; G6 - Saint Joan Princess vs *Our Lady of Flight into Egypt*; G7 - King D. Duarte vs the man with chaperon of the *Slaughter of the Innocents*.
