# Supplementary figures and images for: Proto/Early Renaissance Depictions, Iconographic Analysis and Computerised Face Recognition Connections: 16th Century Frescoes of St. Leocadia Church (Chaves, North of Portugal)
Source: Preprints.org preprint supplement (doi:10.20944/preprints202312.1448.v1), 2023-12-19

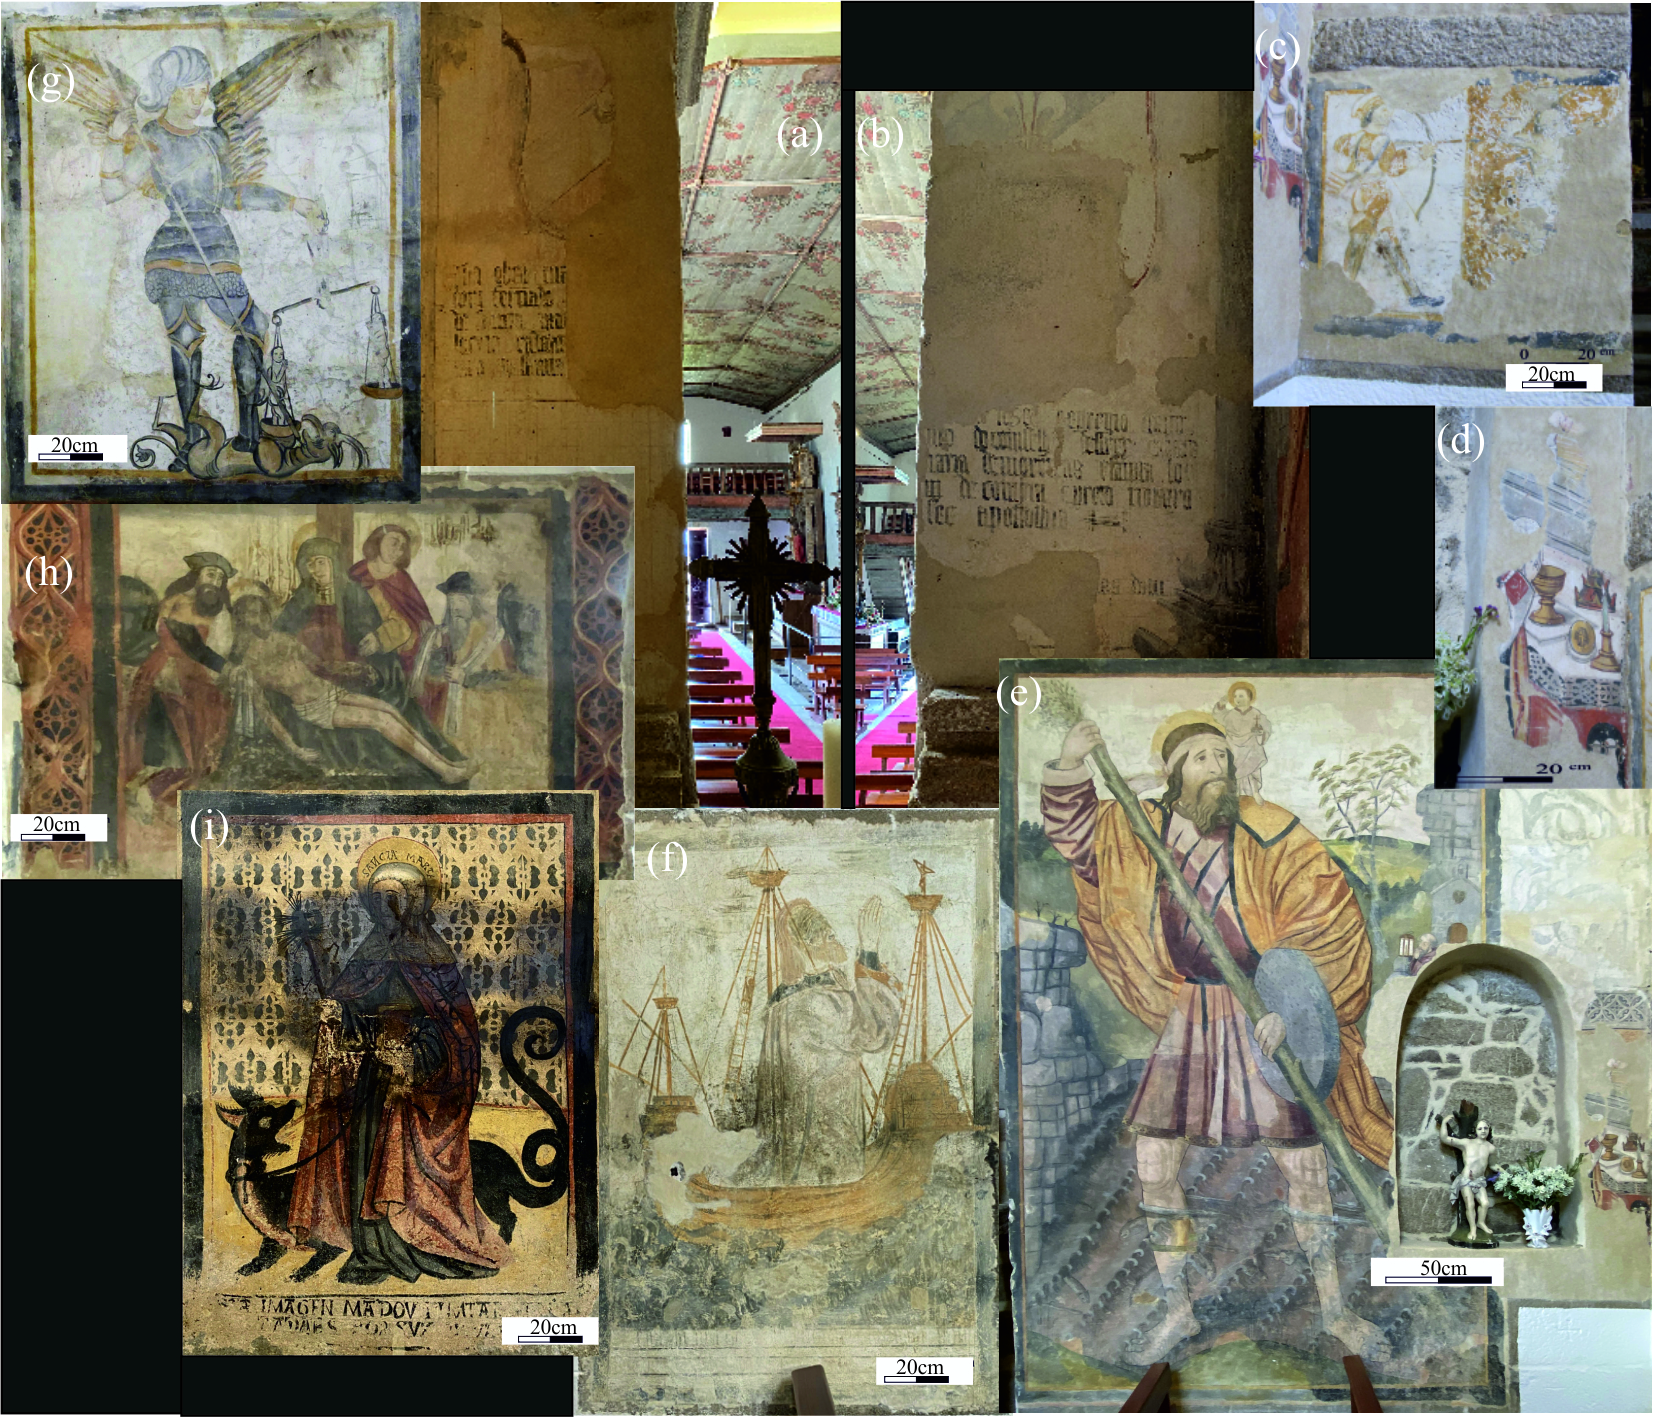

Supplement: Supplementary file 3 [file supplementary › APPENDICES/Figure1_NaveStLeocadia.jpg]

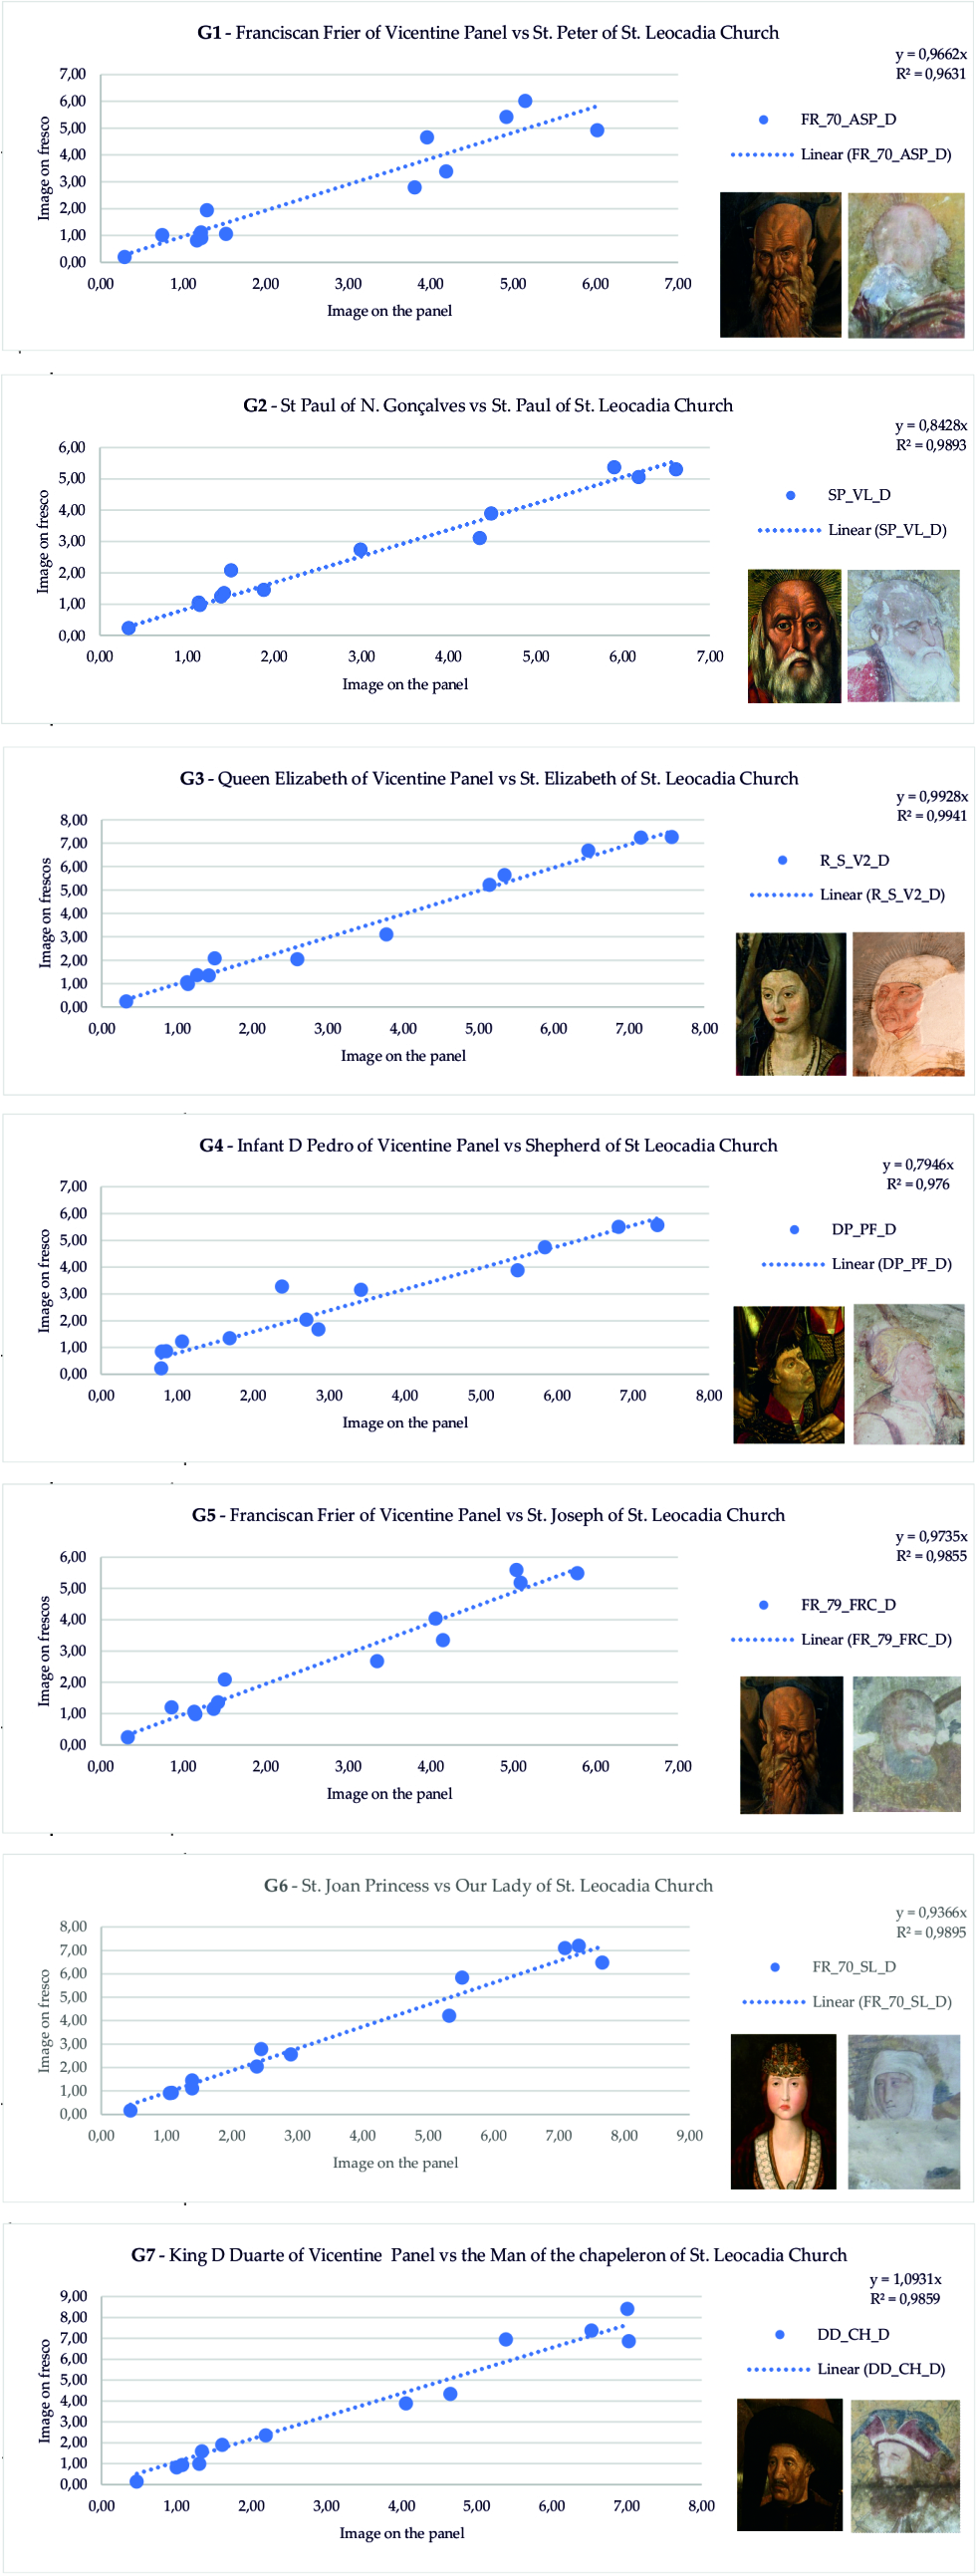

Supplement: Supplementary file 3 [file supplementary › APPENDICES/Figure10_Graphs FRM.jpg]

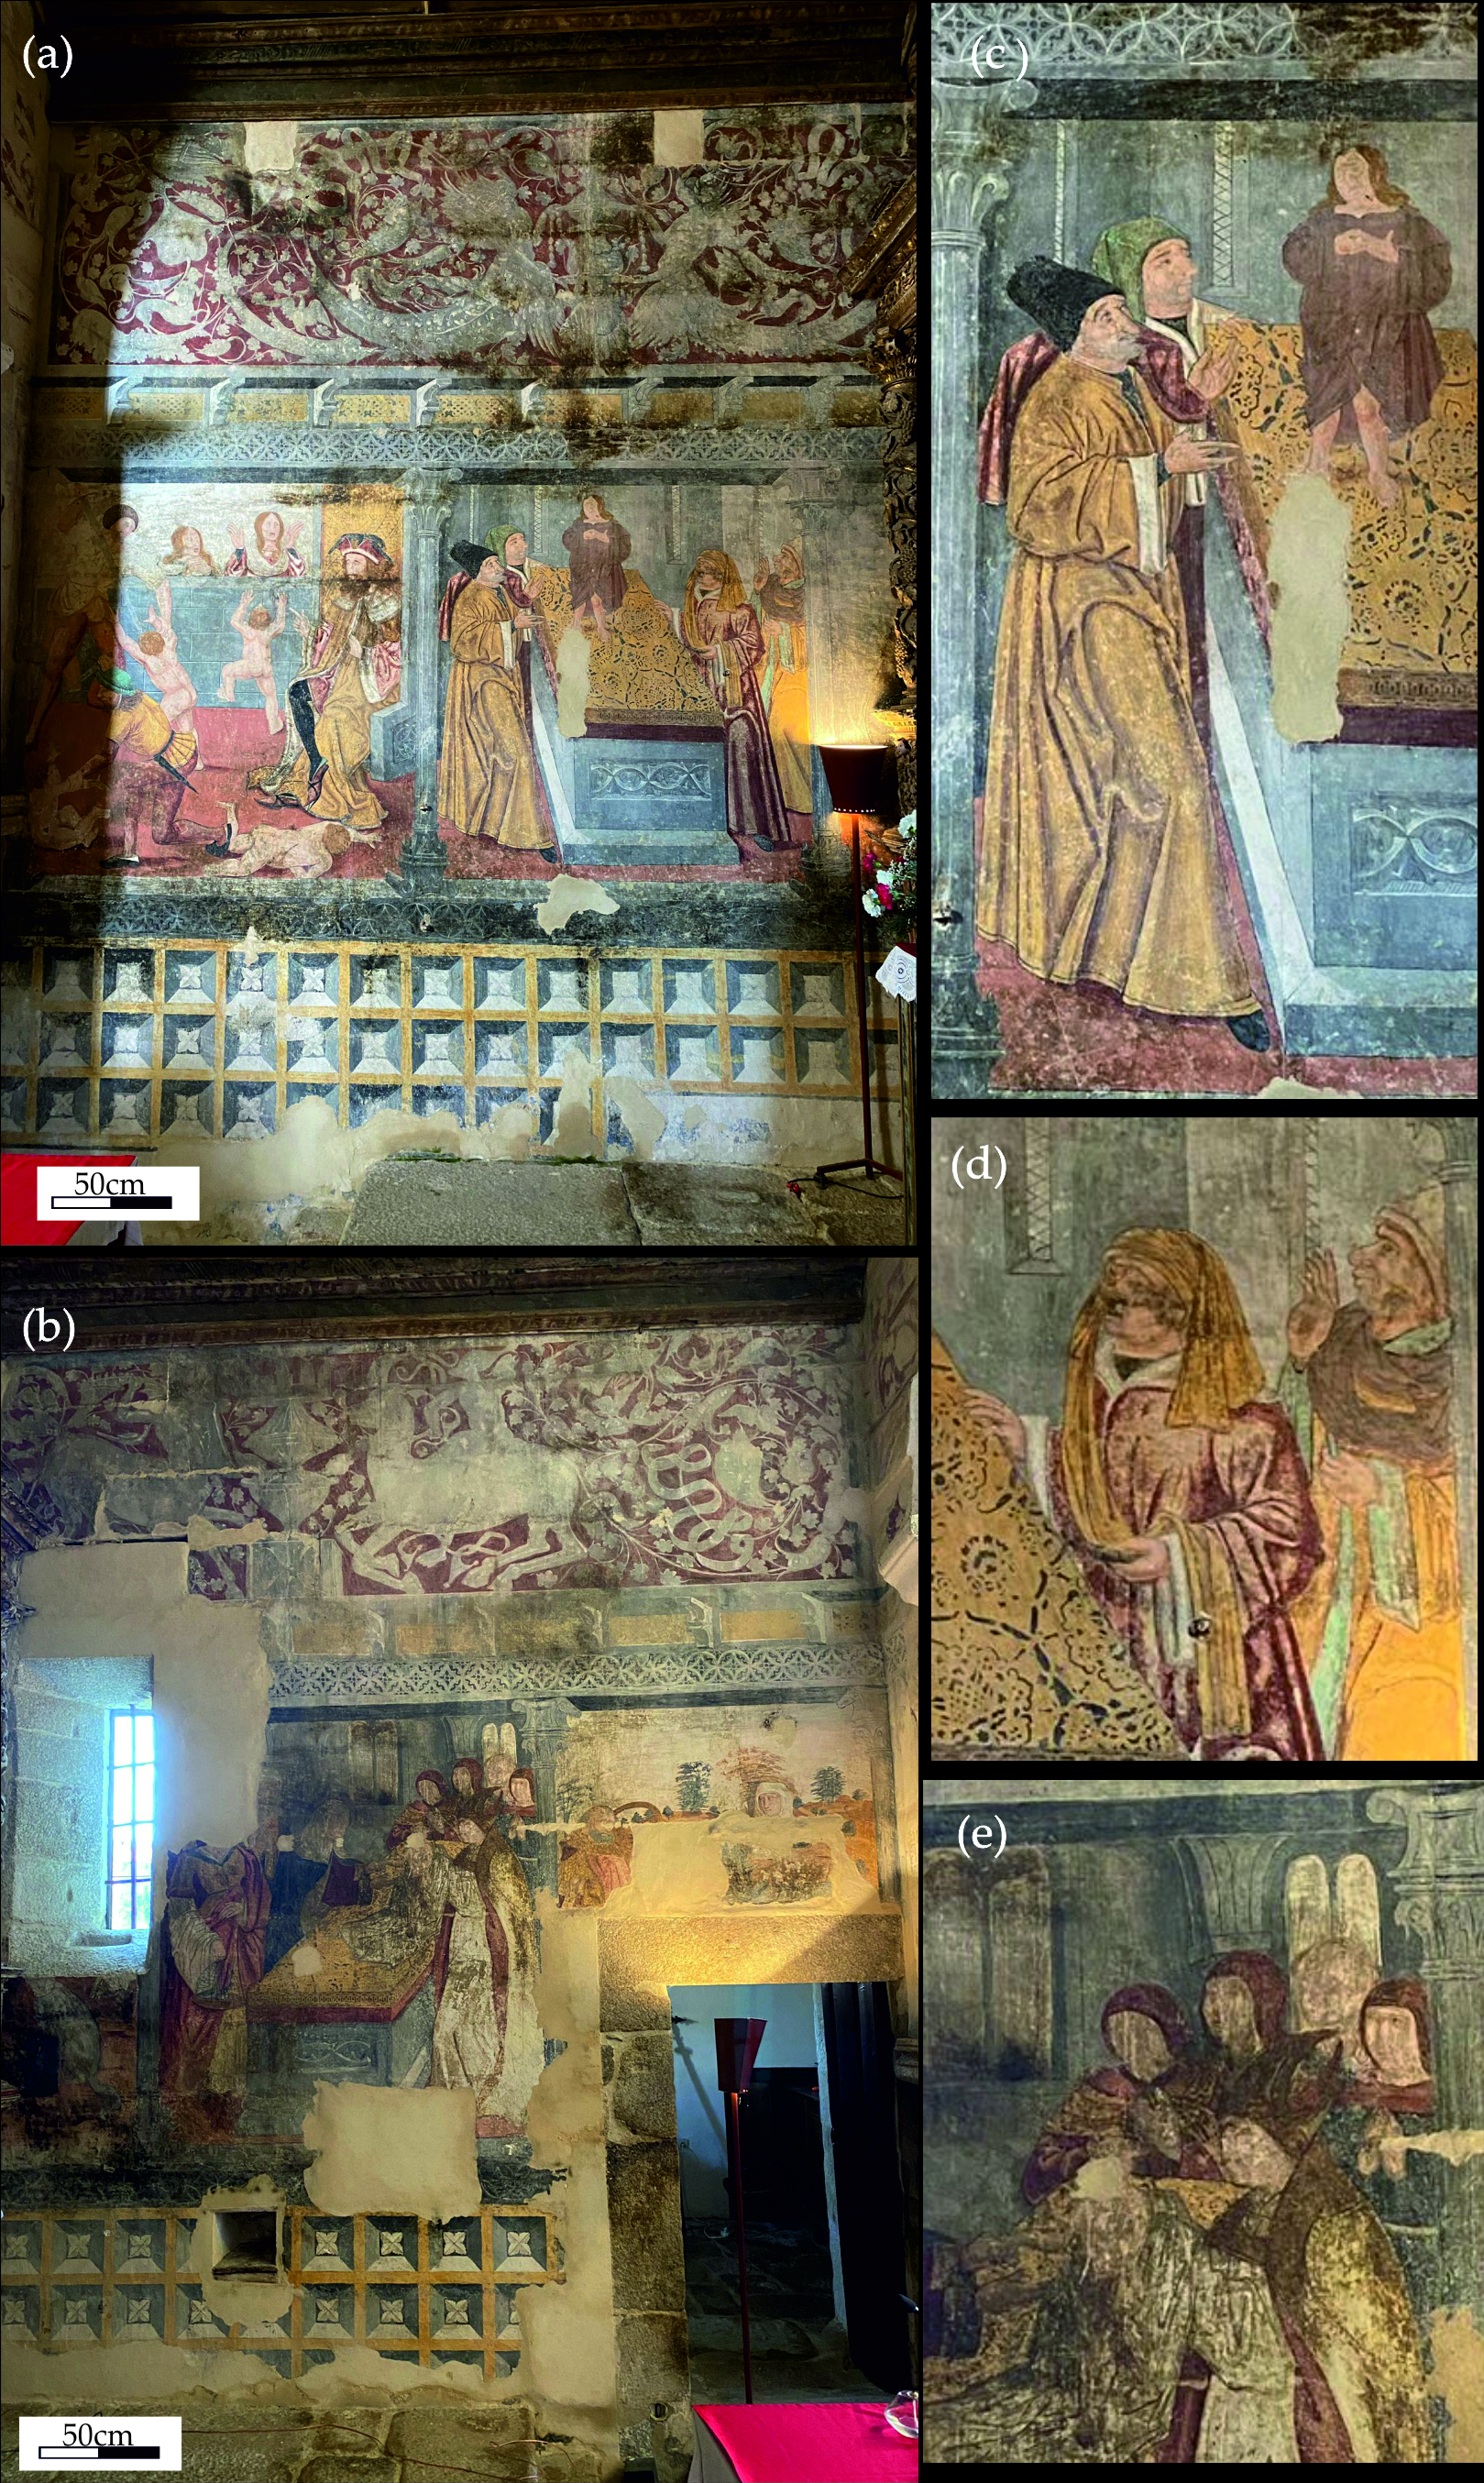

Supplement: Supplementary file 3 [file supplementary › APPENDICES/Figure2_Abside_StaLeocadia.jpg]

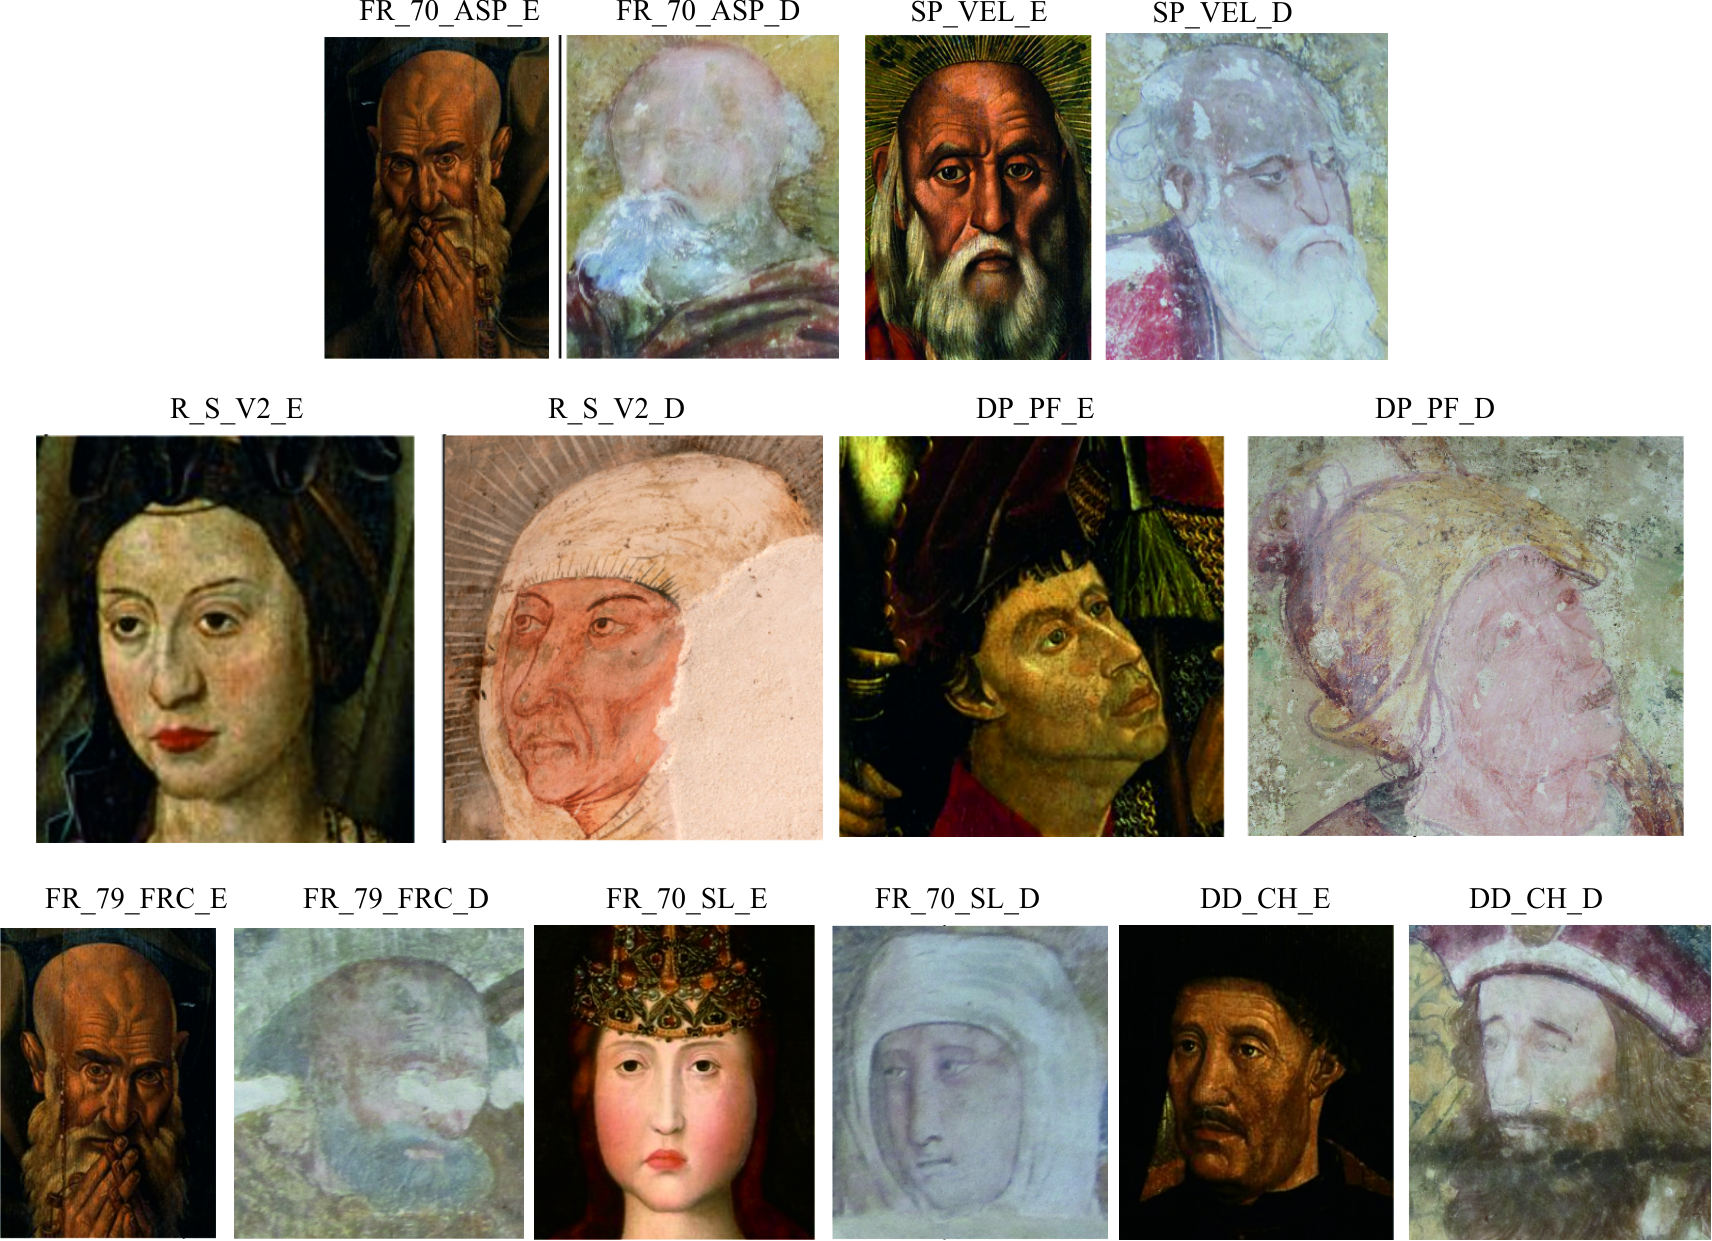

Supplement: Supplementary file 3 [file supplementary › APPENDICES/Figure3_Test - Face Similarity.jpg]

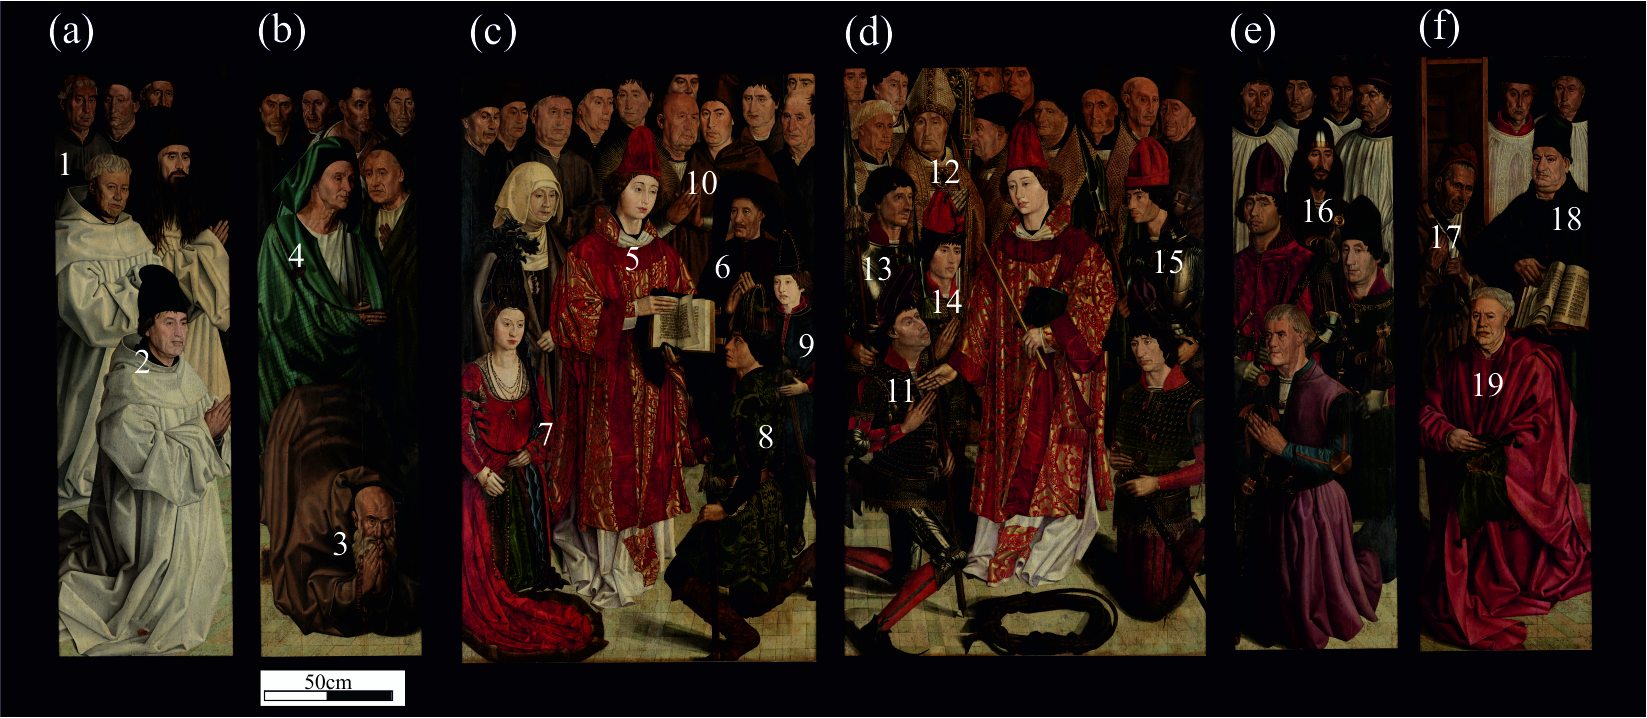

Supplement: Supplementary file 3 [file supplementary › APPENDICES/Figure4_PanelsS.Vicent.jpg]

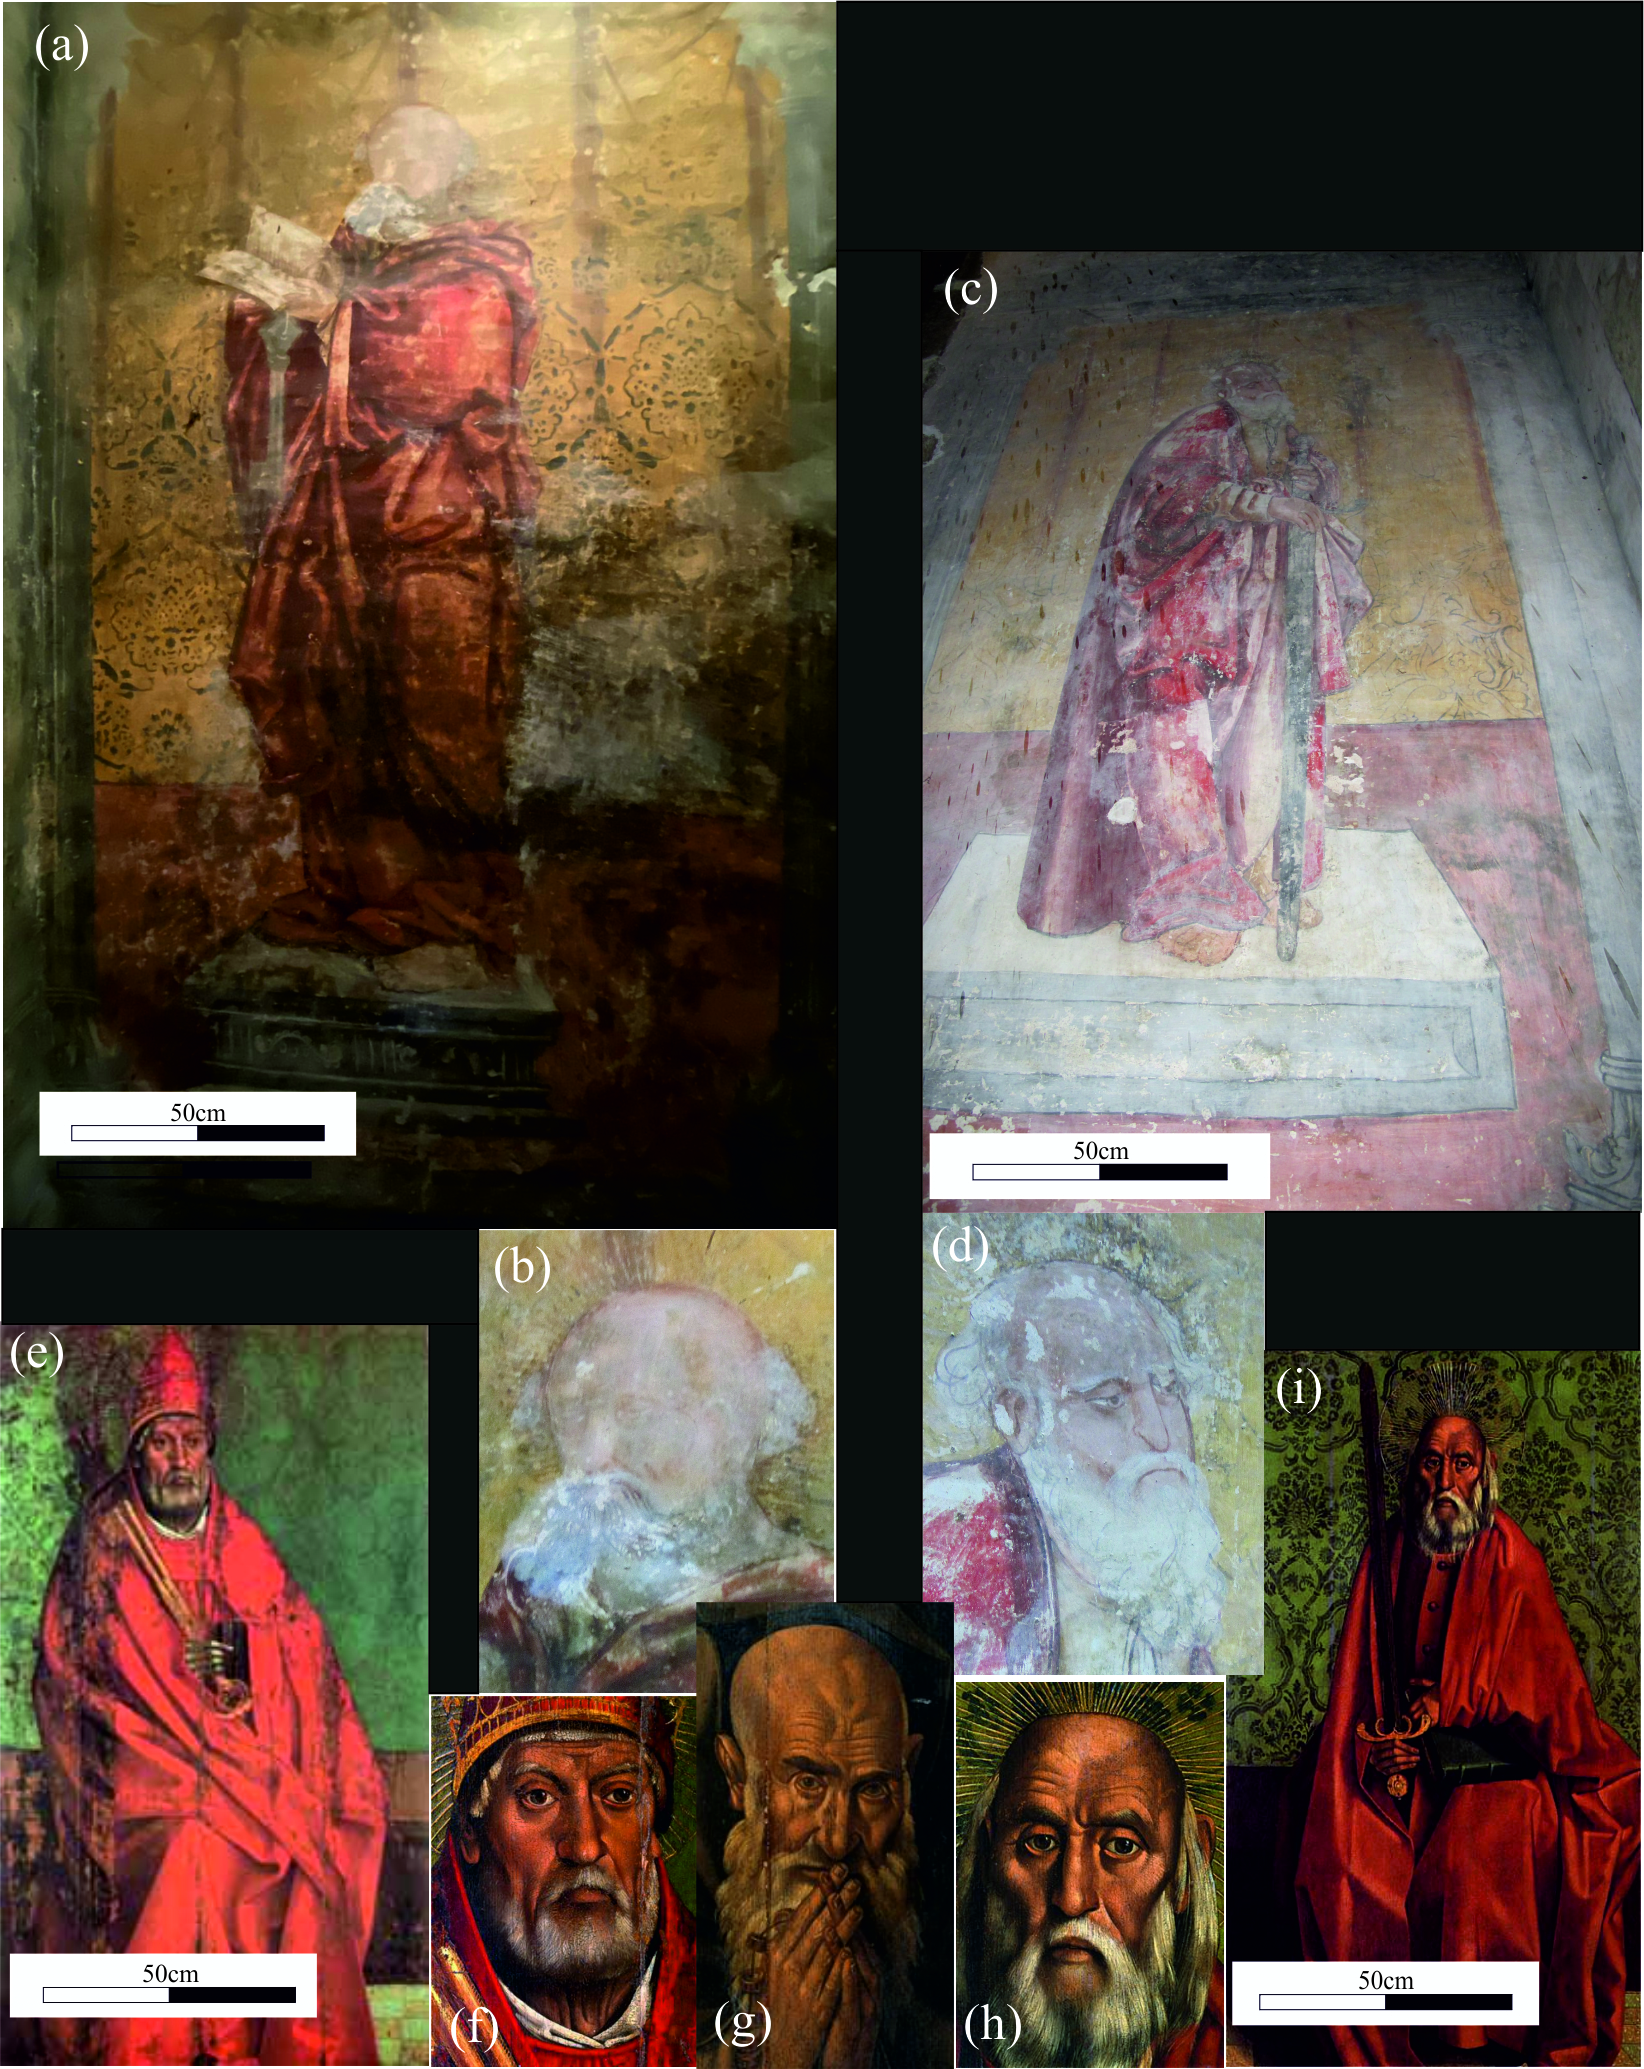

Supplement: Supplementary file 3 [file supplementary › APPENDICES/Figure5_StPeter_StPaul.jpg]

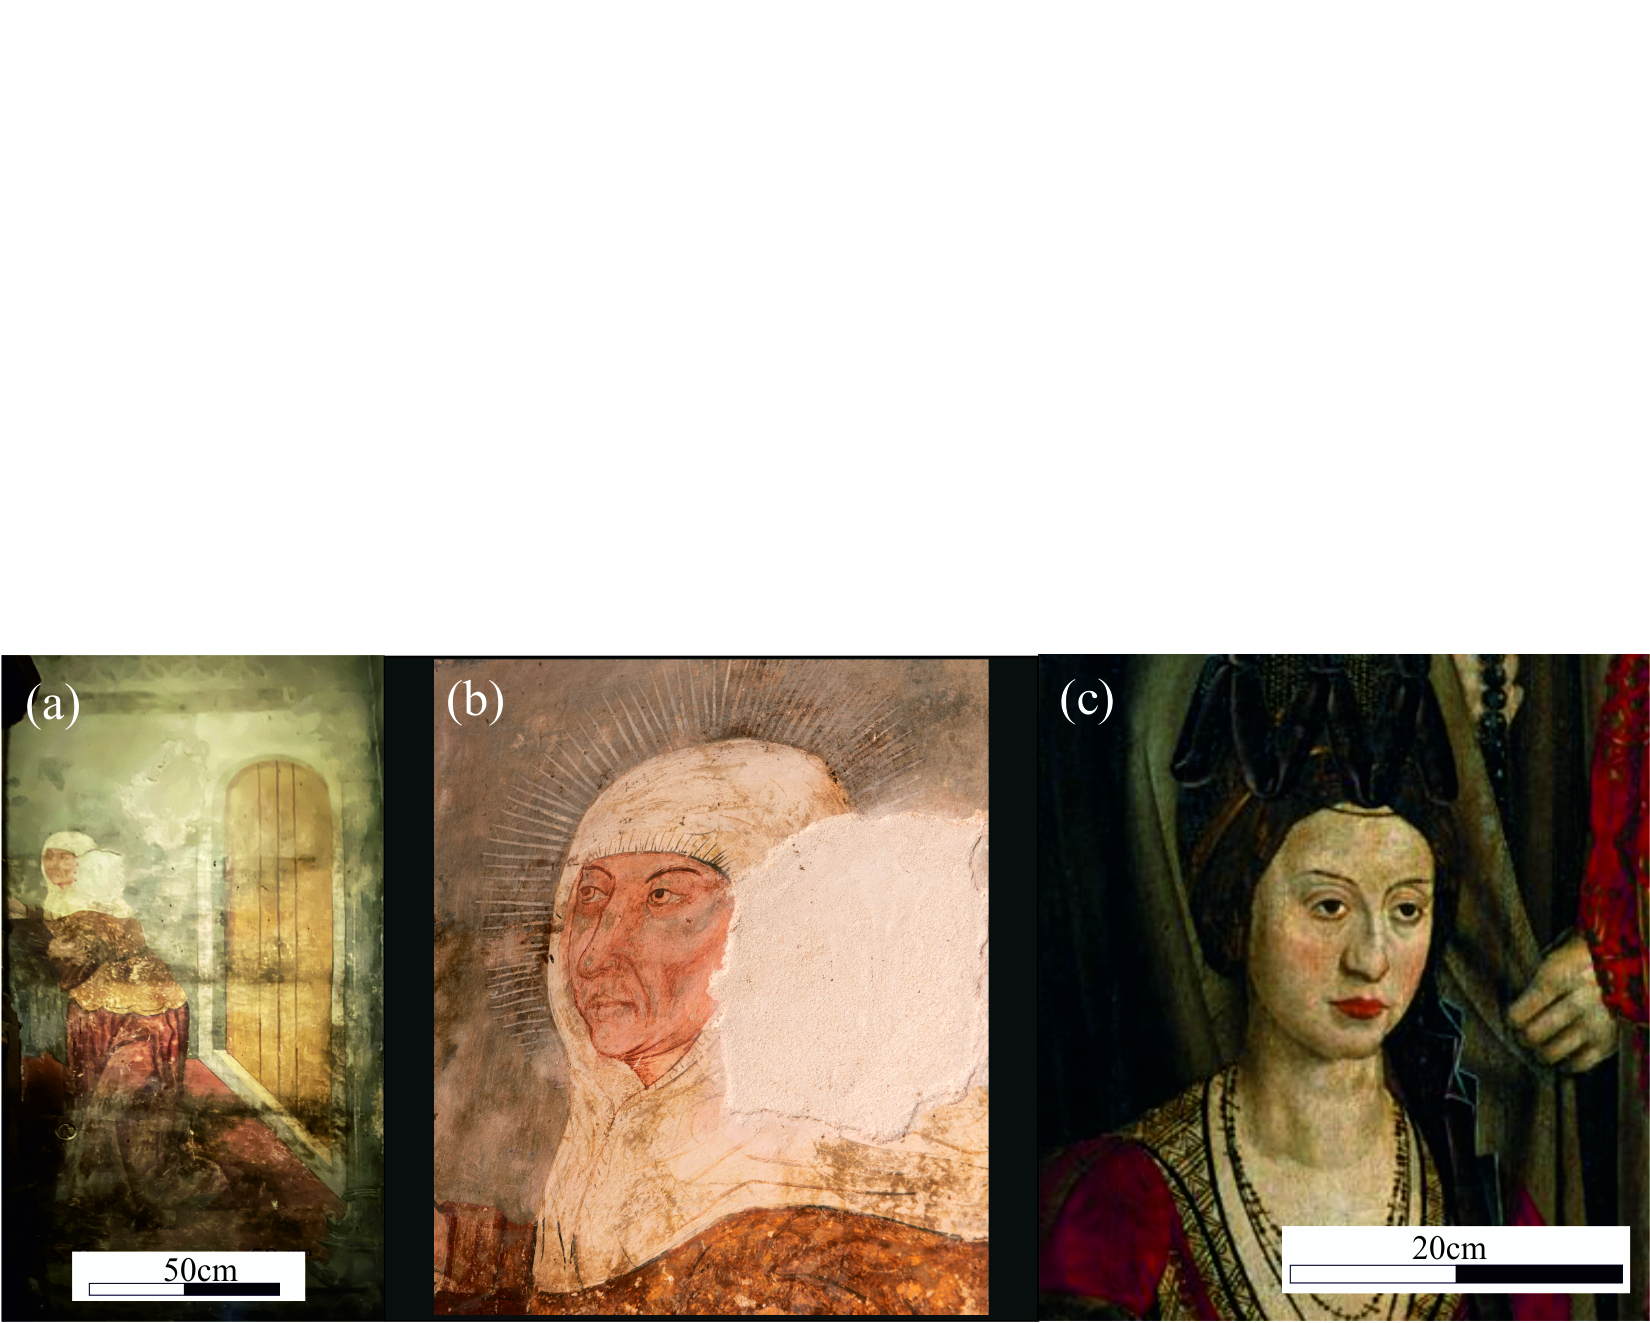

Supplement: Supplementary file 3 [file supplementary › APPENDICES/Figure6_Visitation.jpg]

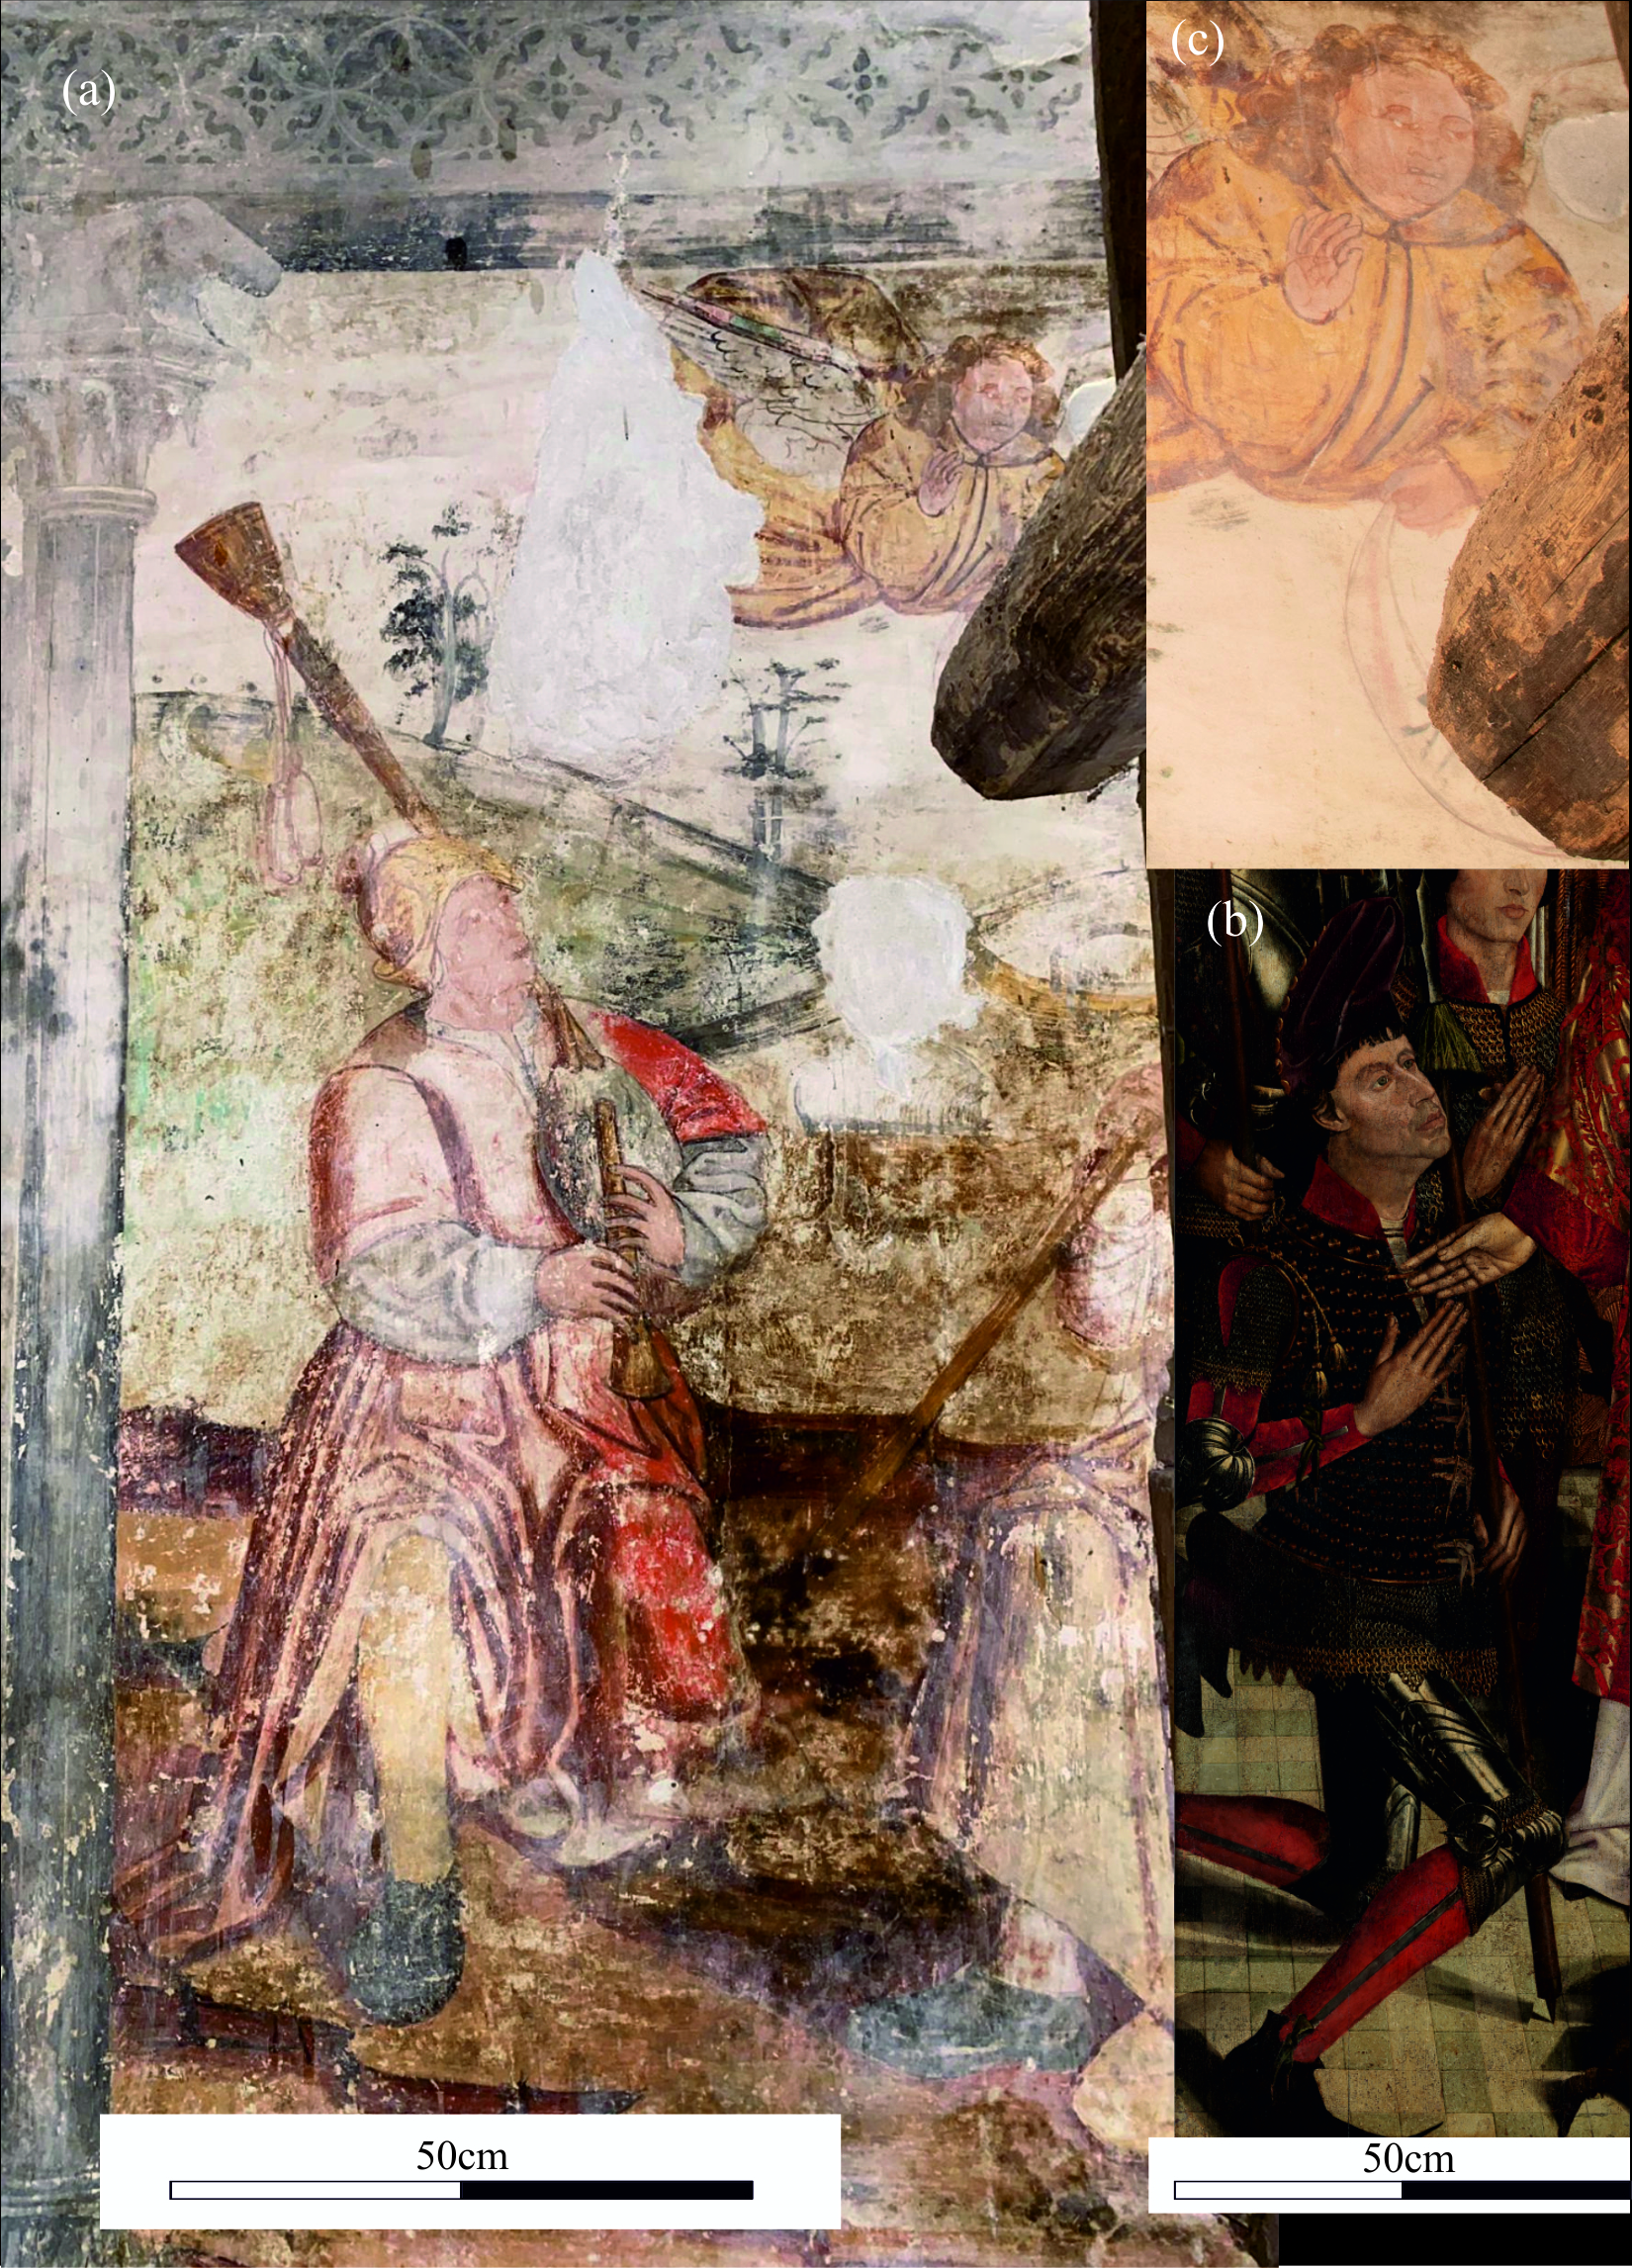

Supplement: Supplementary file 3 [file supplementary › APPENDICES/Figure7_Annunciation.jpg]

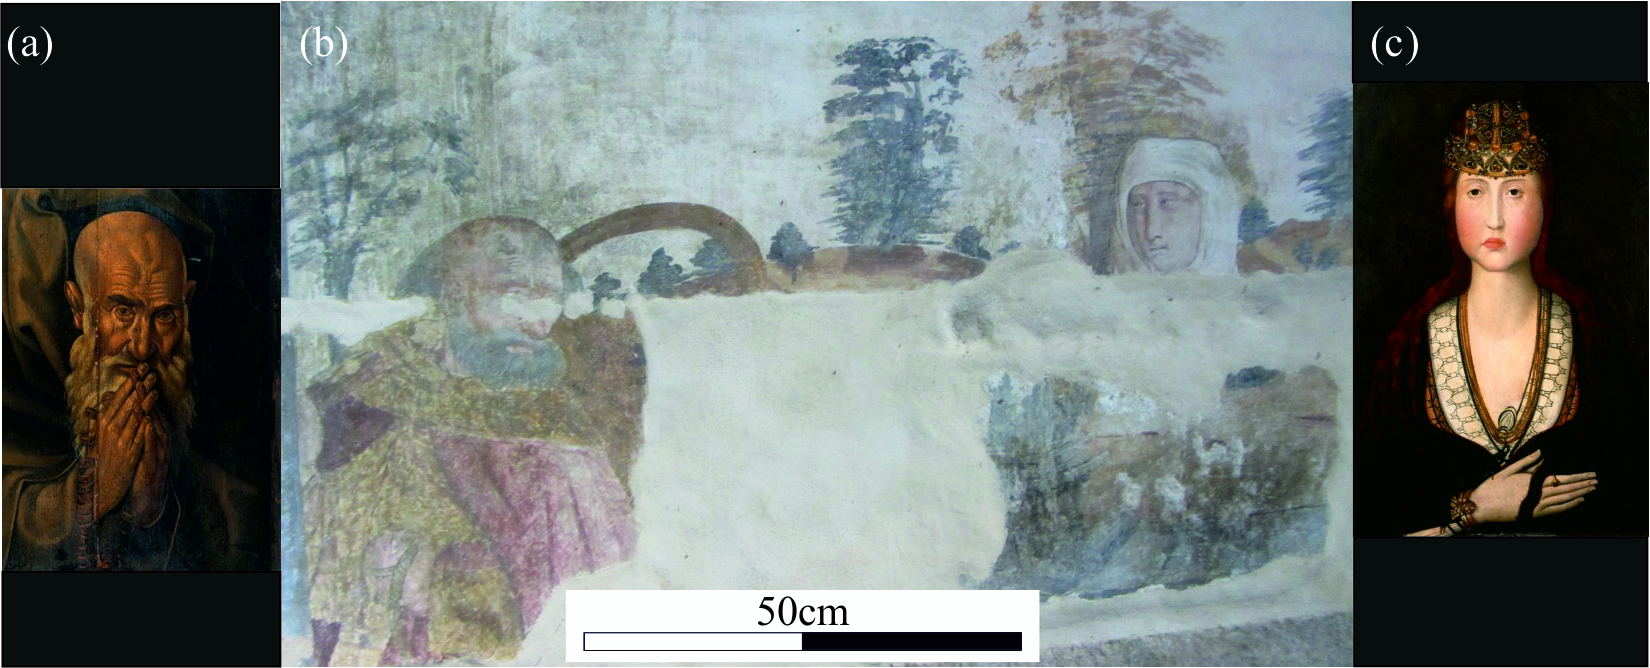

Supplement: Supplementary file 3 [file supplementary › APPENDICES/Figure8_Flight into Egypt.jpg]

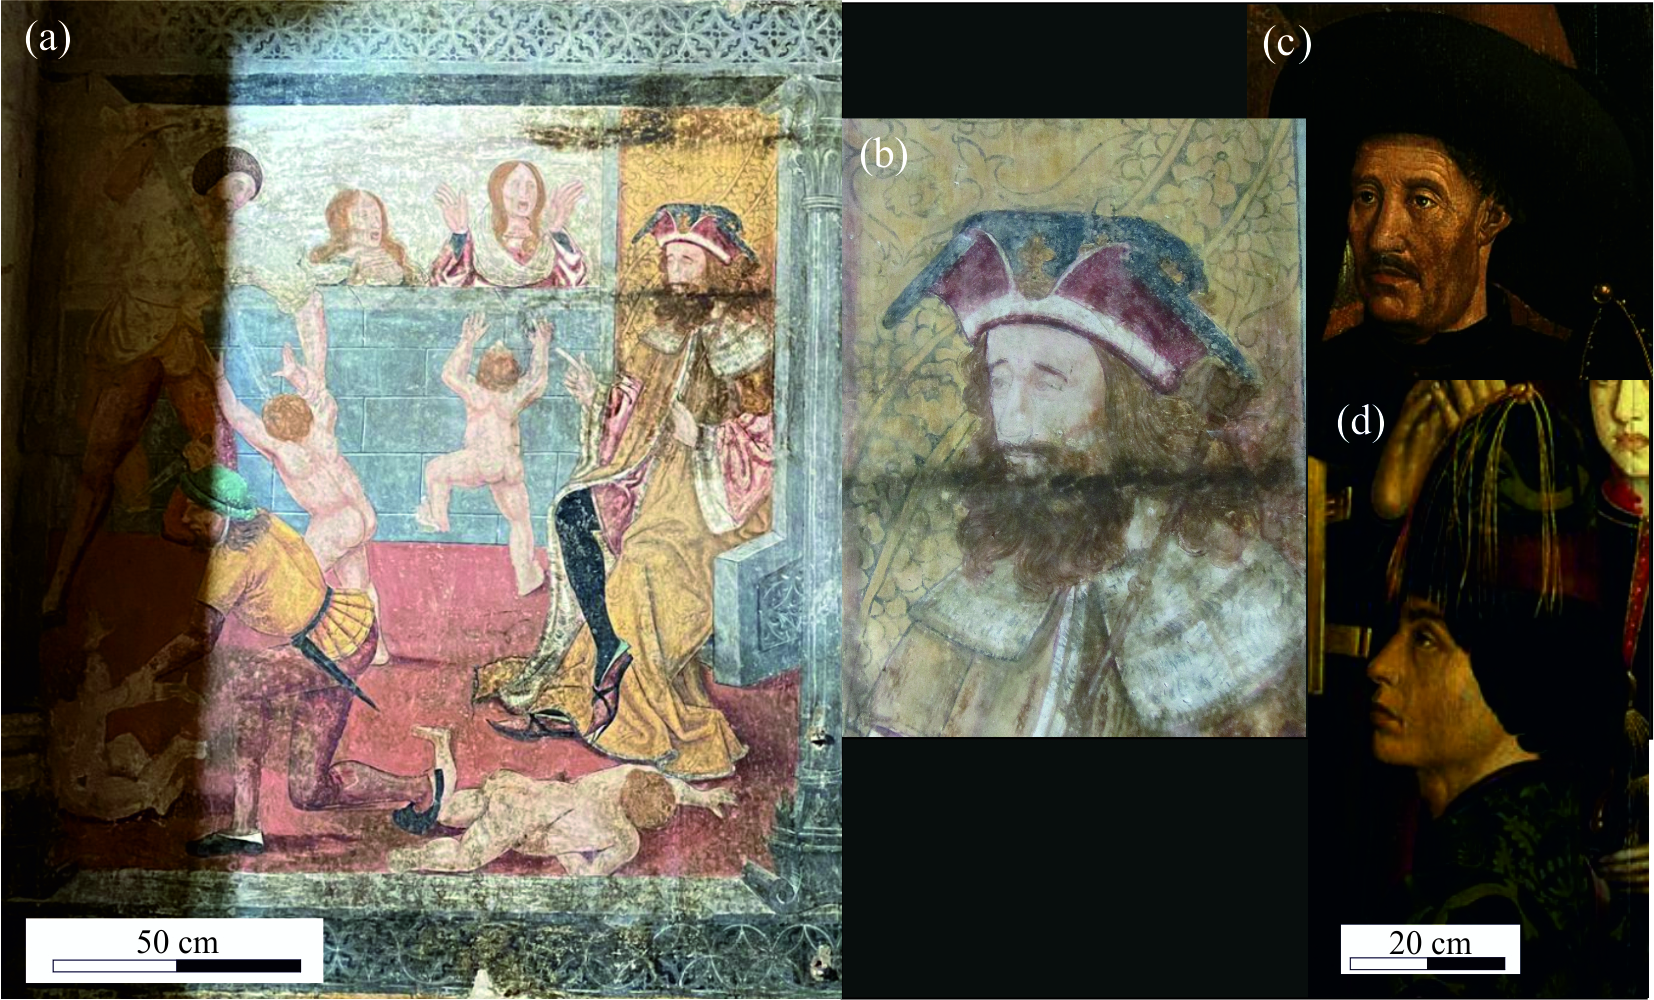

Supplement: Supplementary file 3 [file supplementary › APPENDICES/Figure9_Slaughter Innocents.jpg]
